1 Title Discovery and Genomic Characterization of a Novel Henipavirus, Angavokely virus, from  
2 fruit bats in Madagascar.

3

4 Running Title Novel Henipavirus, AngV, found in Madagascar fruit bat

5

6 Authors

7 Sharline Madera<sup>1</sup>, Amy Kistler<sup>2</sup>, Hafaliana C. Ranaivoson<sup>3,4,5</sup>, Vida Ahyong<sup>2</sup>, Angelo  
8 Andrianiana<sup>5</sup>, Santino Andry<sup>6</sup>, Vololoniaina Raharinosy<sup>4</sup>, Tsiry H. Randriambolamanantsoa<sup>4</sup>, Ny  
9 Anjara Fifi Ravelomanantsoa<sup>5</sup>, Cristina M. Tato<sup>2</sup>, Joseph L. DeRisi<sup>2,7</sup>, Hector C. Aguilar<sup>8</sup>, Vincent  
10 Lacoste<sup>4</sup>, Philippe Dussart<sup>4</sup>, Jean-Michel Heraud<sup>4,9</sup>, Cara E. Brook<sup>3</sup>

11

12 Affiliations

13 <sup>1</sup> Division of Infectious Diseases, Department of Medicine, University of California, San  
14 Francisco, CA, USA

15 <sup>2</sup> Chan Zuckerberg Biohub, San Francisco, CA, USA

16 <sup>3</sup> Department of Ecology and Evolution, University of Chicago, Chicago, IL, USA

17 <sup>4</sup> Virology Unit, Institut Pasteur de Madagascar, Antananarivo, Madagascar

18 <sup>5</sup> Department of Zoology and Animal Biodiversity, University of Antananarivo, Antananarivo,  
19 Madagascar

20 <sup>6</sup> Department of Entomology, University of Antananarivo, Antananarivo, Madagascar

21 <sup>7</sup> Department of Medicine and Biochemistry & Biophysics, University of California, San  
22 Francisco, CA, USA

23 <sup>8</sup> Department of Microbiology and Immunology, College of Veterinary Medicine, Cornell  
24 University, Ithaca, NY, USA

25 <sup>9</sup> Virology Department, Institut Pasteur de Dakar, Dakar, Senegal

26

27 Keywords emerging zoonosis, Henipavirus, novel virus, *Eidolon dupreanum*, bat-borne virus,  
28 Madagascar

29

30 Research area Virology, Microbial genetics

31

32 Word count: 4,184

33 Abstract word count: 242 words

34 Importance count: 150 words

## 35 Abstract

36 The genus *Henipavirus* (family *Paramyxoviridae*) is currently comprised of seven viruses, four of  
37 which have demonstrated prior evidence of zoonotic capacity. These include the biosafety level  
38 4 agents Hendra (HeV) and Nipah (NiV) viruses, which circulate naturally in pteropodid fruit  
39 bats. Here, we describe and characterize Angavokely virus (AngV), a divergent henipavirus  
40 identified in urine samples from wild, Madagascar fruit bats. We report the near-complete  
41 16,740 nt genome of AngV, which encodes the six major henipavirus structural proteins  
42 (nucleocapsid, phosphoprotein, matrix, fusion, glycoprotein, and L polymerase). Within the  
43 phosphoprotein (P) gene, we identify an alternative start codon encoding the AngV C protein  
44 and a putative mRNA editing site where the insertion of one or two guanine residues encodes,  
45 respectively, additional V and W proteins. In other paramyxovirus systems, C, V, and W are  
46 accessory proteins involved in antagonism of host immune responses during infection.  
47 Phylogenetic analysis suggests that AngV is ancestral to all four previously described bat  
48 henipaviruses—HeV, NiV, Cedar virus (CedV), and Ghanaian bat virus (GhV)—but evolved more  
49 recently than rodent- and shrew-derived henipaviruses, Mojiang (MojV), Gamak (GAKV), and  
50 Daeryong (DARV) viruses. Predictive structure-based alignments suggest that AngV is unlikely to  
51 bind ephrin receptors, which mediate cell entry for all other known bat henipaviruses.  
52 Identification of the AngV receptor is needed to clarify the virus’s potential host range. The  
53 presence of V and W proteins in the AngV genome suggest that the virus could be pathogenic  
54 following zoonotic spillover.

55

56

57

58

## 59 Importance

60 Henipaviruses include highly pathogenic emerging zoonotic viruses, derived from bat, rodent,  
61 and shrew reservoirs. Bat-borne Hendra (HeV) and Nipah (NiV) are the most well-known  
62 henipaviruses, for which no effective antivirals or vaccines for humans have been described.  
63 Here we report the discovery and characterization of a novel henipavirus, Angavokely virus  
64 (AngV), isolated from wild fruit bats in Madagascar. Genomic characterization of AngV reveals  
65 all major features associated with pathogenicity in other henipaviruses, suggesting that AngV  
66 could be pathogenic following spillover to human hosts. Our work suggests that AngV is an  
67 ancestral bat henipavirus which likely uses viral entry pathways distinct from those previously  
68 described for HeV and NiV. In Madagascar, bats are consumed as a source of human food,  
69 presenting opportunities for cross-species transmission. Characterization of novel henipaviruses  
70 and documentation of their pathogenic and zoonotic potential are essential to predicting and  
71 preventing the emergence of future zoonoses that cause pandemics.

72 Introduction

73 Henipaviruses (HNVs) belong to a genus of bat-, rodent-, and shrew-borne viruses within the  
74 family *Paramyxoviridae* with demonstrated zoonotic potential. HNVs can manifest extreme  
75 virulence in human hosts, as exemplified by the prototypical HNVs, Hendra virus (HeV), and  
76 Nipah virus (NiV), which cause severe acute respiratory distress and/or encephalitis in humans,  
77 yielding case fatality rates that can exceed 90% (1–3). This high pathogenicity and the lack of  
78 approved HNV therapeutics or vaccines for humans have garnered HeV and NiV classification as  
79 Biological Safety Level 4 (BSL4) agents and WHO priority diseases. Since their discovery in the  
80 1990s, HeV and NiV have periodically spilled over to humans from their reservoir hosts,  
81 pteropodid bats. HeV zoonosis is mediated by spillover to intermediate horse hosts, from which  
82 humans acquire infection(4). NiV can spillover to humans via intermediate transmission  
83 through pig hosts, or directly from bat-to-human, resulting in near-annual outbreaks of fatal  
84 encephalitis in South Asia, where subsequent human-to-human transmission also occurs (2, 5–  
85 7).

86  
87 Novel HNVs continue to emerge from wildlife hosts and represent ongoing threats to human  
88 health. Initially, the *Henipavirus* genus comprised only HeV and NiV; however, the past two  
89 decades have witnessed the discovery of five new HNVs: bat-borne Cedar virus (CedV) and  
90 Ghanaian bat virus (GhV), rodent-borne Mojiang virus (MojV), and shrew-borne Gamak (GAKV)  
91 and Daeryong viruses (DARV) (8–11). Of these novel HNVs, at least two show evidence of  
92 zoonotic potential: serological data suggests prior human exposure to GhV in West Africa (12),  
93 while MojV was first identified following a human outbreak of severe pneumonia in Chinese  
94 mine workers, all of whom died after infection(9). In addition to their high potential for  
95 pathogenicity, HNVs possess a broad host range that spans at least seven mammalian orders,  
96 including bats (10, 13).

97  
98 Cross-species viral spillover necessitates effective inter-species transmission, which first  
99 requires a virus to successfully enter the cells of diverse host species. In general, HNVs use the  
100 highly-conserved ephrin family of proteins, both type A and type B, as cell entry receptors (1, 8,  
101 14–16). A notable exception to this pattern is MojV, which does not use ephrin proteins—or the  
102 sialic acid and CD150 receptors common to non-HNV paramyxoviruses—to gain cell entry (14,  
103 17). Indeed, as of yet, the viral entry receptor for MojV—and the closely related GAKV and  
104 DARV—remain unknown. In general, viruses in the genus *Henipavirus* have broad host ranges  
105 and cause high case fatality rates following human spillover, making the characterization of new  
106 HNVs a high public health priority.

107

108 The HNV genome consists of six structural proteins: nucleocapsid (N), phosphoprotein (P),  
109 matrix (M), fusion (F), glycoprotein (G), and polymerase (L). In comparison with other members  
110 of the family *Paramyxoviridae*, HNVs have relatively larger genomes (approximately 18kb vs  
111 16kb). This extended length is largely due to several, long 3' untranslated regions (UTR) of the  
112 N, P, F and G mRNAs (18, 19). The genome length of HNVs, like all paramyxoviruses, adheres to  
113 the so-called 'Rule of Six', whereby viral genomes consistently demonstrate polyhexameric  
114 length (20). The 'Rule of Six' is believed to be a requirement for efficient genome replication  
115 under the unique mRNA editing features of the paramyxovirus genome (20). The paramyxovirus  
116 P locus exhibits notable transcription properties that are shared across most members of the  
117 *Paramyxoviridae* family. The P gene permits the translation of additional accessory proteins  
118 from either gene editing events within the locus (prior to translation) or an overlapping ORF in  
119 the P gene itself. All HNVs, with the exception of CedV, harbor a highly conserved mRNA editing  
120 site at which the insertion of additional guanine residues can result in the translation of  
121 accessory proteins, V and W, involved in viral antagonism and evasion of the host immune  
122 system (1). The HNV P gene also contains an overlapping ORF that allows for the synthesis of a  
123 third accessory protein, C, which is also involved in viral host immune evasion (1).

124  
125 Our lab has previously demonstrated evidence of exposure to henipa-like viruses in serum  
126 collected from three endemic Madagascar fruit bat species (*E. dupreanum*, *Pteropus rufus*, and  
127 *Rousettus madagascariensis*) using a Luminex serological assay which identified cross reactivity  
128 to CedV/NiV/HeV-G and -F proteins (21). The most significant antibody binding previously  
129 detected corresponded to the NiV-G antigen for *E. dupreanum* serum and the HeV-F antigen for  
130 *P. rufus* and *R. madagascariensis* serum, suggesting the potential circulation of multiple HNVs in  
131 the Madagascar fruit bat system (21). Fruit bats, including *E. dupreanum*, are consumed widely  
132 in Madagascar as a source of human food, presenting opportunities for cross-species zoonotic  
133 emergence. This underscores the importance of further characterization of the pathogenic and  
134 zoonotic potential of AngV and other potential HNVs circulating in the Madagascar fruit bat  
135 system. Here, we describe and characterize a novel bat HNV, Angavokely virus (AngV),  
136 recovered from urine samples collected from the Madagascar fruit bat, *E. dupreanum*. Our  
137 work suggests AngV is part of an ancestral group of HNVs that may rely on a novel, non-ephrin-  
138 mediated viral entry pathway.

139

140 Methods

141 *Ethics Statement*

142 Animal capture and handling and subsequent collection of biological samples were conducted  
143 in strict accordance with the Madagascar Ministry of Forest and the Environment (permit  
144 numbers 019/18, 170/18, 007/19) and guidelines posted by the American Veterinary Medical

145 Association. Field protocols were approved by the UC Berkeley Animal Care and Use Committee  
146 (ACUC Protocol # AUP-2017-10-10393), as previously described (22).

147

#### 148 *Animal capture, sample collection, and RNA extraction*

149 Fruit bats were captured and processed in part with a long-term study investigating the  
150 seasonal dynamics of potentially zoonotic viruses in Madagascar, as has been previously  
151 described (21–25). Animals were identified morphologically by species, sex, and age class  
152 (juvenile vs. adult), and urine swabs were collected into viral transport medium from any  
153 individual that urinated during handling. Urine swabs were flash-frozen in liquid nitrogen in the  
154 field and delivered to -80°C freezers at Institut Pasteur de Madagascar for long-term storage.  
155 Urine specimens from 206 bats were randomly selected for total RNA extraction using the Zymo  
156 Quick RNA/DNA Microprep Plus kit, performed as previously described (22).

157

#### 158 *mNGS library preparation*

159 Total urine RNAs were diluted with nuclease-free H<sub>2</sub>O, and 5 $\mu$ L of each specimen was used as  
160 input for mNGS library preparation. A 2-fold dilution series of a 25ng/ $\mu$ L stock of HeLa total RNA  
161 (n=8 samples), along with 5 water samples were included and processed in parallel as positive  
162 and negative controls, respectively. Additionally, a 25pg aliquot of External RNA Control  
163 Consortium (ERCC) spike-in mix (Thermo-Fisher) was included in each sample. Dual-indexed  
164 mNGS library preparations for the samples were miniaturized and performed in 384-well  
165 format with NEBNext Ultra II RNAseq library preparation kit (New England Biolabs) reagents.  
166 RNA samples were fragmented for 12 min at 94°C, and 16 cycles of PCR amplification were  
167 performed. Per sample read yields from a small scale iSeq (Illumina) paired-end 2 x 146bp  
168 sequencing run on an equivolume pool of the individual libraries were used to normalize  
169 volumes of the individual mNGS libraries to generate an equimolar pool. Paired-end 2 x 146bp  
170 sequencing of the resulting equimolar library pool was performed on the NovaSeq6000  
171 (Illumina) to obtain approximately 50 million reads per sample.

172

#### 173 *Sequence analysis*

174 Raw reads from urine sample sequencing were first uploaded to the CZBID (v6.8) platform for  
175 host and quality filtering and *de novo* assembly (26). In brief, in the CZBID pipeline, adaptor  
176 sequences were removed with Trimmomatic (v.0.38), and reads were quality filtered (27).  
177 Reads then underwent host-filtration against the Malagasy fruit bat genome, *E. dupreanum*,  
178 using STAR (v 2.7.9a) (28) and a second host-removal step using Bowtie2 (29). After host  
179 filtering, reads were aligned using rapsearch2 (30) and Gsnap (31), and putative pathogen taxa  
180 were identified. Next, reads were assembled using SPADES (v.3.15.3) (32), and all contigs  
181 generated were subject to BLAST analysis against the putative taxa previously identified by

182 rapsearch2 and Gsnap. We considered samples positive for HNV if the CZBID pipeline produced  
183 at least one contig with an average read depth of two or more, which yielded a BLAST  
184 alignment length >100 nt/aa and an e-value < 0.00001 (BLASTn v2.5.0+) or a bit score >100  
185 (BLASTx v2.5.0+) when queried against an HNV database derived from all HNV genomes  
186 available in NCBI (Accessed July 2021).

187

### 188 *Genome Annotation and Comparison*

189 One urine sample, collected from an adult female *E. dupreanum* fruit bat in March 2019,  
190 yielded a near full-length HNV genome, which we analyzed in greater depth in subsequent  
191 analyses and annotated as the novel HNV, AngV (Genbank Accession #: ON613535). Nucleotide  
192 BLAST of the AngV genome identified NiV (GenBank Accession #: AF212302) as the top hit for  
193 this novel virus and was subsequently chosen as the reference genome for further analysis. We  
194 aligned AngV to NiV (GenBank Accession #: AF212302) in the program Geneious Prime  
195 (v2020.2.4) and annotated all six major HNV structural genes, and the accessory C ORF, within  
196 the P gene. We identified the putative mRNA editing site within the P gene sequence (spanning  
197 nucleotides 1,225-1,232 of the P gene) and manually added one or two guanine (G) residues to  
198 the 3' end of the conserved HNV mRNA editing site to generate V and W ORFs, respectively,  
199 and their corresponding proteins. We furthered queried all identified transcriptional elements  
200 against publicly available sequences using NCBI BLAST and BLASTx (33). Resulting BLAST and  
201 BLASTx hits were used in phylogenetic analyses as described below.

202

203 We used the program pySimPlot to scan the whole genome sequence of AngV for nucleotide  
204 sequence identity to the NiV genome (GenBank Accession #: AF212302) and the nucleotide and  
205 amino acid sequences of individual Open Reading Frames (ORFs) contained therein.  
206 Respectively, window size and scanning were specified as 50 and one for nucleotide pairwise  
207 identity and 50 and five for amino acid pairwise identity. Results were visualized using Prism  
208 (9.2.0).

209

### 210 *Phylogenetic analyses*

211 We constructed 10 Maximum Likelihood (ML) phylogenetic trees to analyze the evolutionary  
212 relatedness of our putative HNV to previously described paramyxoviruses. These included (a)  
213 one amino acid L protein phylogeny comparing the L protein of AngV to all reference L protein  
214 paramyxovirus sequences in NCBI, in addition to the newly-described shrew HNV, GAKV and  
215 DARV (accessed November 2021) and (b) nine amino acid phylogenies comparing each  
216 individual protein annotated in AngV (N, P, C, V, W, M, F, G, L) against the top 50 BLASTx  
217 sequence hits for each protein collapsed on 98% sequence similarity. Distinct outgroups were  
218 applied: (a) Sunshine Coast Virus (GenBank Accession #: YP\_009094051.1) for L protein, (b)

219 Human orthopneumovirus (HRSV, GenBank Accession #: NC\_001781) for N, P, M, F, G, L  
220 proteins, and (c) Sendai virus (GenBank Accession #: NP\_056872) for gene C.

221 For each phylogenetic tree, we aligned sequences via the MUSCLE algorithm (v3.8.1551) (34)  
222 and determined the best fit nucleotide or amino acid substitution model for using ModelTest-  
223 NG (35). Phylogenies were then constructed in RAXML-NG (36), using the corresponding best fit  
224 model: JTT (complete L-protein sequence) or LG+G4+F (individual proteins). In accordance with  
225 best practices outlined in the RAXML-NG manual, twenty ML inferences were made on each  
226 original alignment. Bootstrap replicate trees were inferred using Felsenstein's method (37).  
227 MRE-based bootstopping test was applied after every 200 replicates (38), and bootstrapping  
228 was terminated once diagnostic statistics dropped below the threshold value. Bootstrap  
229 support values were drawn on the best-scoring tree.

230 We additionally computed one Bayesian time-resolved phylogeny, using all 77 full-length HNV  
231 nucleotide sequences available in NCBI, including our newly contributed AngV (GenBank  
232 Accession #: ON613535). As with ML trees, sequences were first aligned in MUSCLE (v3.8.1551)  
233 (34), and the best fit nucleotide substitution model was subsequently queried in ModelTest-NG  
234 (35). We then constructed a Bayesian timetree in the program BEAST2 (39, 40), using the best  
235 fit GTR+I+G4 model inferred for the whole genome alignment from ModelTest-NG and  
236 assuming a constant population prior. Sampling dates corresponded to collection data as  
237 reported in NCBI Virus; we assumed a collection date of 31-July in cases where only year of  
238 collection was reported. We computed trees using both an uncorrelated exponentially  
239 distributed relaxed molecular clock (UCED) and a strict clock but here report results from the  
240 strict clock only as similar results were inferred from both. We ran Markov Chain Monte Carlo  
241 (MCMC) sample chains for 1 billion iterations, checked convergence using TRACER v1.7 (41) and  
242 averaged trees after 10% burn-in using TreeAnnotator v2.6.3 (42) to visualize mean posterior  
243 densities at each node. The resulting phylogeny was visualized in R v.4.0.3 for MacIntosh in the  
244 'ggtree' package (43).

245

#### 246 *AngV G Protein Structure Modeling*

247 We used the Artificial Intelligence system, AlphaFold, to predict the 3D structure of the AngV  
248 glycoprotein (G) (44). Molecular graphics and analyses of the AngV glycoprotein structure were  
249 performed with UCSF ChimeraX (45). HNV glycoprotein ephrin binding residues were aligned  
250 using the program Geneious Prime (v2020.2.4).

251

#### 252 Results

253 *Discovery and prevalence of HNV in Malagasy bats*

254 Urine swab specimens from 206 bats were collected in 8 roosting sites across the island of  
255 Madagascar from 2013 to 2019 (Figure 1). Urine samples were collected during wet and dry  
256 seasons from all three Madagascar fruit bat species, *P. rufus*, *E. dupreanum*, and *R.*  
257 *madagascariensis* (Table 1). Isolated RNA from urine swab specimens generated an average of  
258 19 million paired-read sequences. In total, 10/206 (4.9%) bats were positive for HNV; all  
259 positive samples were collected from *E. dupreanum* bats (10/106; 9.4%) at the Angavokely cave  
260 roosting site (Table 1). Positive samples were collected in wet and dry seasons from both male  
261 and female adults.  
262

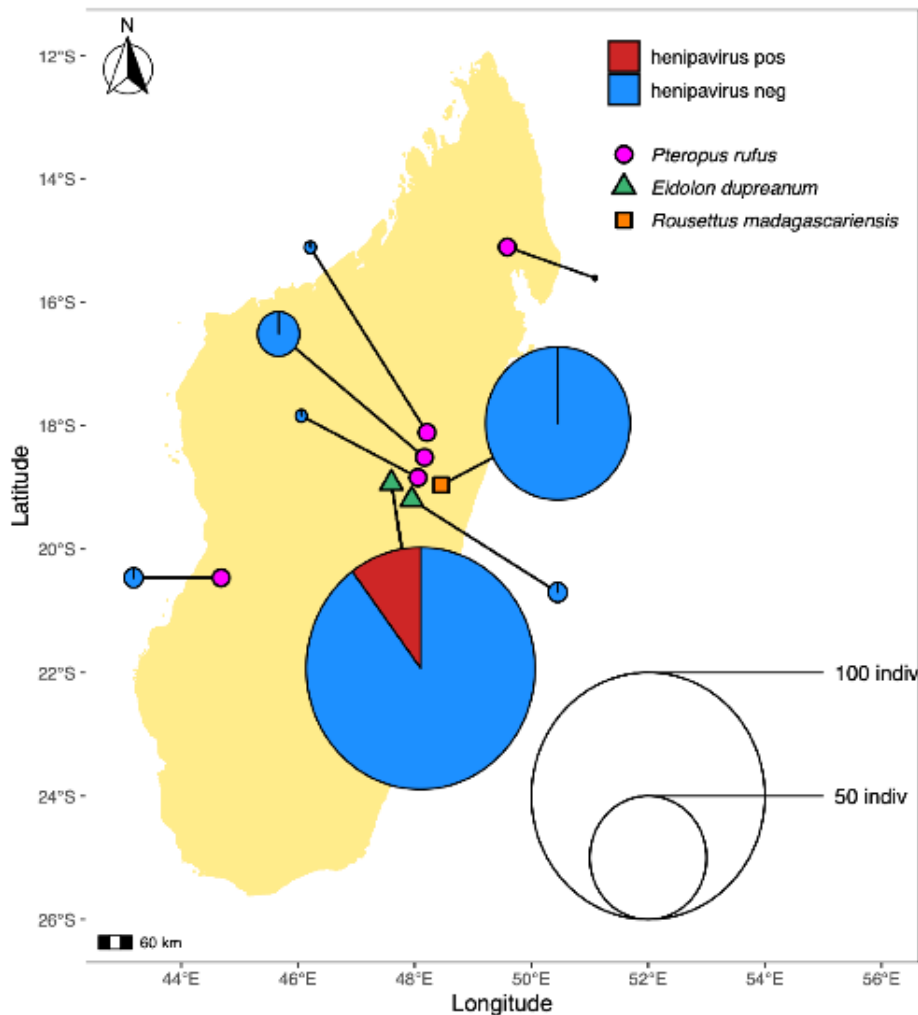

263

264 **Figure 1.** Geographic location of sampling sites used in this study. Sampling sites grouped by bat species found  
265 depicted as follows *P. rufus* (pink circles) Ambakoana (-18.51 S, 48.17 E) / Mahabo (-20.46 S, 44.68 E) /  
266 Mahialambo (-18.11 S, 48.21 E) / Makira (-15.11 S, 49.59 E) / Marovitsika (-18.84 S, 48.06 E) roosts; *E. dupreanum*  
267 (green triangles) Angavobe (-18.94 S, 47.95 E) / Angavokely (-18.93 S, 47.76 E) caves; *R. madagascariensis* (orange  
268 squares) Maromizaha cave (-18.96 S, 48.45). Pie charts are size-weighted by total bat population sampled at each  
269 site, corresponding to the legend. The percentage of HNV positive samples is shown for all sampled species and  
270 sites. HNV positive samples were only recovered from the *E. dupreanum* Angavokely site.



271

## 272 Genomic characterization of AngV

273 We recovered one near-full-length HNV contig (16,740 nt), supported by an average sequencing  
274 depth of 14 reads (Figure 2A), from a urine sample collected from an adult, non-lactating *E.*  
275 *dupreanum* female in the 2018-2019 wet season (capture date: 15-March 2019). We focused  
276 subsequent genomic analyses on this longest sequence, which we named Angavokely virus  
277 (AngV) after the site of *E. dupreanum* capture.

278

279 As with other members of the *Henipavirus* genus, the genome of AngV is organized into 6 open  
280 reading frames (ORF) arranged in the order 3'-N-P-M-F-G-L-5'. AngV shares an average  
281 nucleotide identity of 36% with the NiV reference genome (AF212302) and a varying amino acid  
282 identity that is highest across the ORFs encoding for the nucleocapsid and L polymerase  
283 proteins (Figures 2B, 2C).

284

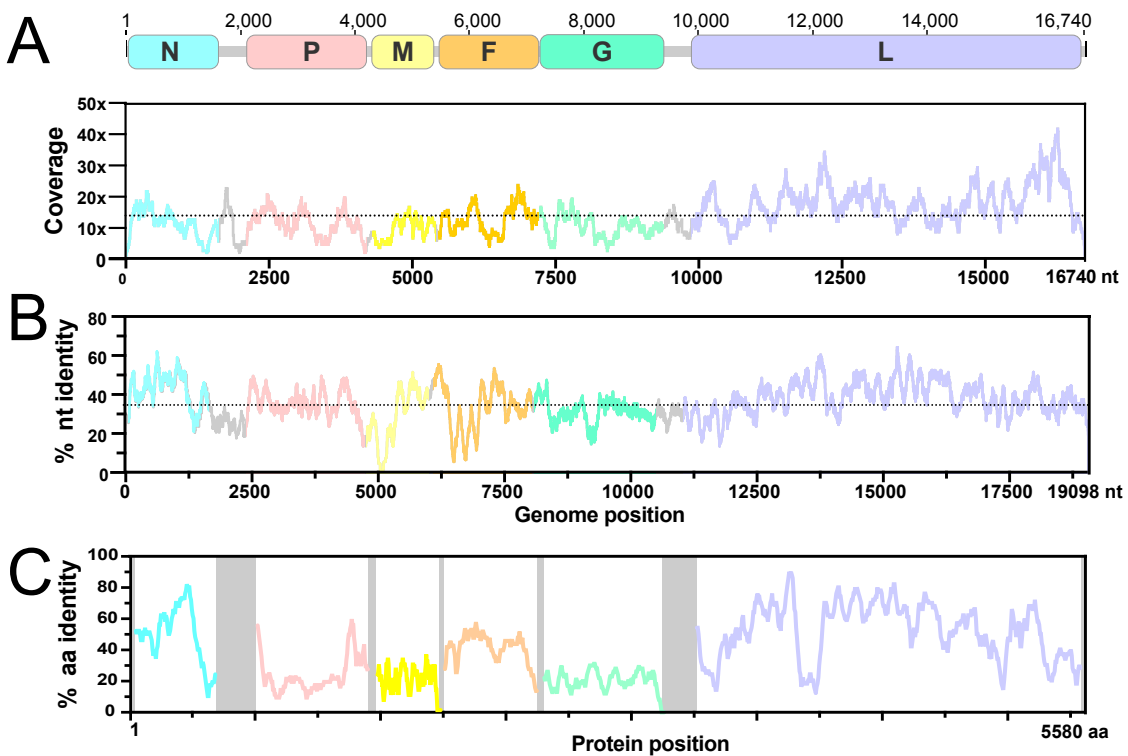

285

286 **Figure 2.** AngV genome organization. A. Coding regions for each gene are shown and depicted in color, non-coding  
287 intergenic and terminal regions are highlighted in gray. Depicted genes represented as follows: nucleocapsid (N),

288 RNA polymerase (P and L), matrix (M), fusion (F), and glycoprotein (G). Sequencing read depth supporting each  
 289 position of the recovered genome sequence is plotted below the genomic schematic. Scanning nucleotide (B) and  
 290 amino acid (C) pairwise identity to Nipah virus (GenBank Accession #: AF212302). Dotted horizontal lines represent  
 291 average read depth (14.29) or average nucleotide pairwise identity (36%).  
 292

293 *AngV coding regions*

294 The P gene of AngV follows an organization similar to most members of the *Henipavirus* genus.  
 295 AngV harbors alternative start sites which, respectively, encode the P and C proteins, as well as  
 296 a conserved putative mRNA editing site common to most paramyxoviruses A<sup>4-6</sup>G<sup>2-3</sup> (Figure 3A  
 297 and B). AngV shares an identical putative mRNA editing site with the recently discovered HNVs,  
 298 MojV and GAKV. Pseudotemplated addition of one or two G residues at the conserved putative  
 299 mRNA editing site generates a putative V and W protein, respectively (Figure 3C; W protein in  
 300 Supplemental Figure 1). In congruence with members of the *Henipavirus* genus that encode the  
 301 conserved putative mRNA editing site, the putative V protein of AngV harbors a unique C-  
 302 terminal region that contains a highly conserved cysteine-rich zinc finger domain (Figure 3C).  
 303  
 304

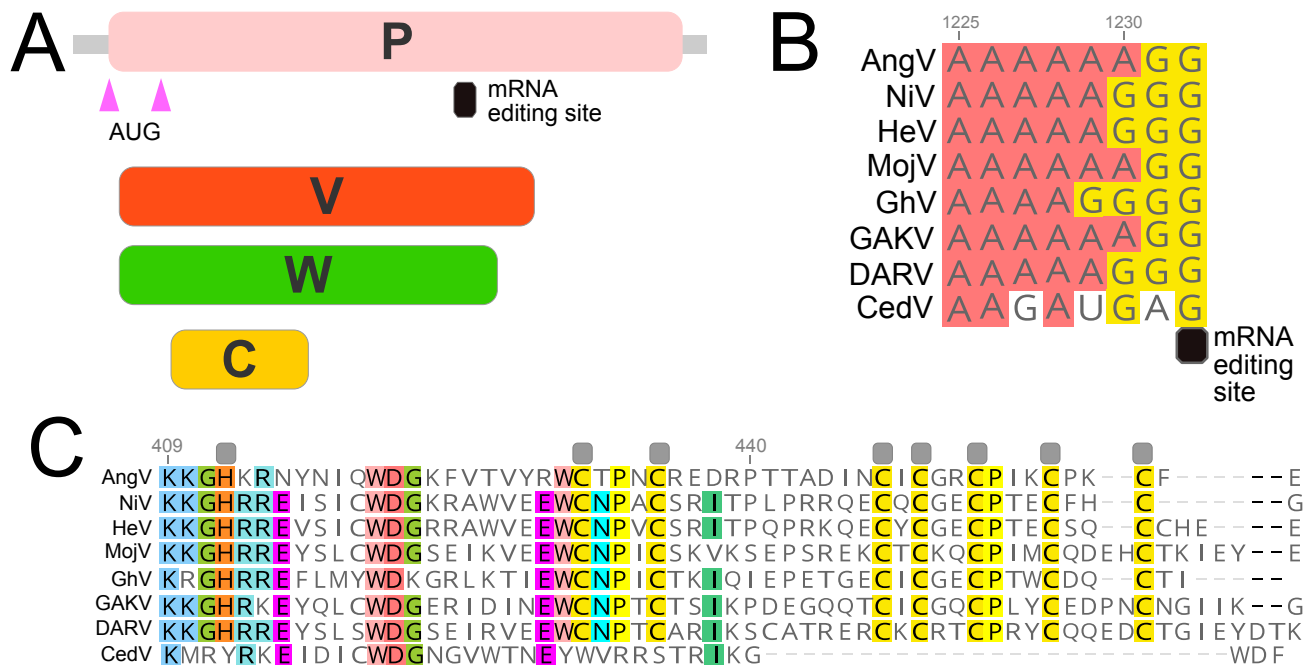

305  
 306 **Figure 3.** Organization of the P gene of AngV. A. Alternative transcriptional start sites (pink triangle) generate the P  
 307 and C protein. Pseudotemplated addition of one or two guanine nucleotides at the putative mRNA editing site  
 308 generates a V and W protein, respectively. B. Sequence alignment of the putative mRNA editing site across  
 309 members of the *Henipavirus* genus (cRNA depicted). C. Amino acid alignment of the unique C terminal region of  
 310 the V protein following the addition of one guanine nucleotide to the putative mRNA editing site. Gray boxes

311 denote conserved cysteine and histidine residues suggested to directly coordinate bound zinc ions (54). Individual  
312 nucleotides or amino acids are color coordinated if at least 75% conserved at the alignment position. Nucleotide or  
313 amino acid position numbers displayed represent the position within the AngV gene or protein. Virus name  
314 (abbreviation), followed by GenBank Accession #: Angavokely virus (AngV) ON613535; Nipah virus (NiV) AF212302;  
315 Hendra virus (HeV) AF017149; Mojiang virus (MojV) KF278639; Ghanaian bat Henipavirus (GhV) HQ660129;  
316 Daeryong virus (DARV) MZ574409; Gamak virus (GAKV) MZ574407, Cedar virus (CedV) JQ001776. CedV is shown  
317 here only for comparison, as the CedV P protein is not believed to undergo RNA editing or to generate a functional  
318 V protein (8, 54).

319

320 The length of each ORF in the AngV genome resembles those from previously described HNVs,  
321 with the exception of the gene encoding the glycoprotein (G)—which, at 688 aa, is 56 aa longer  
322 than the longest previously-characterized HNV glycoprotein from GhV (632 aa; Table 2) (15).  
323 BLAST analysis indicates that AngV ORFs for genes encoding the nucleocapsid (N), matrix (M),  
324 and polymerase (L) proteins exhibit the highest nucleotide and amino acid pairwise identity  
325 with other HNVs, with highest similarity shared with the NiV L protein (nt 74.7%, aa 52.2%,  
326 Table 2). In contrast to many emerging viruses, AngV largely exhibits higher nucleotide vs.  
327 amino acid identity with other HNVs (Table 2). The more recently discovered HNVs (MojV,  
328 CedV, GAKV, DARV, GhV) mirror this pattern, showing higher nucleotide vs. amino acid identity  
329 when compared to NiV and HeV (data not shown).

330

### 331 *AngV non-coding regions*

332 Examination of all viral intergenic regions (in cRNA orientation) reveals that AngV exhibits the  
333 highly conserved CTT intergenic junction site characteristic of other HNVs, as well as gene stop  
334 and gene start sites with high similarity to those of previously described HNVs (Supplemental  
335 Table 1). We were unable to locate the intergenic junction site and transcriptional start or stop  
336 site in the 5' region of the N ORF for AngV, suggesting that the genomic 3' untranslated regions  
337 (UTR) for AngV have not yet been fully recovered. Comparison of the 5' and 3' UTRs for AngV  
338 with those of other HNVs reveals UTRs of varying lengths within the *Henipavirus* genus  
339 (Supplemental Table 2). Nevertheless, AngV exhibits similar lengths and a nucleotide identity of  
340 roughly 30-40% for the 5' and 3' UTRs of most HNV genes; however, the P gene 3' UTR, the M  
341 gene 5' and 3' UTRs, and the F gene 5' and 3' UTRs, are significantly shorter in AngV compared  
342 with previously described HNVs. Correspondingly, nucleotide identity varies when comparing  
343 this shorter subset of 5' and 3' UTRs for AngV against other HNVs (Supplemental Table 2).

344

345 *Phylogenetic Analyses*

346 Phylogenetic analysis of complete L protein amino acid sequences across the *Paramyxoviridae*

347 family places AngV within the *Henipavirus* genus at <0.82 nucleotide substitutions away from

348 the node distinguishing the family *Paramyxoviridae* from the *Sunviridae* (Figure 4A). AngV

349 clusters independently within the *Henipavirus* genus and diverges ancestral to all currently

350 known bat-borne HNVs. Our time-resolved Bayesian phylogeny further corroborates this result,

351 placing AngV ancestral to all previously described bat-borne HNVs but more recently diverged

352 than the rodent- and shrew-borne HNVs, MojV, GAKV, and DARV (Figure 4B; Supplemental

353 Figure 2). We estimate the divergence of the AngV lineage from the rest of the HNV clade at

354 9,794 years ago (95% HPD 6,519-14,024 years), and the time to the Most Recent Common

355 Ancestor (MRCA) for the entire HNV genus as 11,195 years ago (95% HPD 7,351-15,905 years).

356

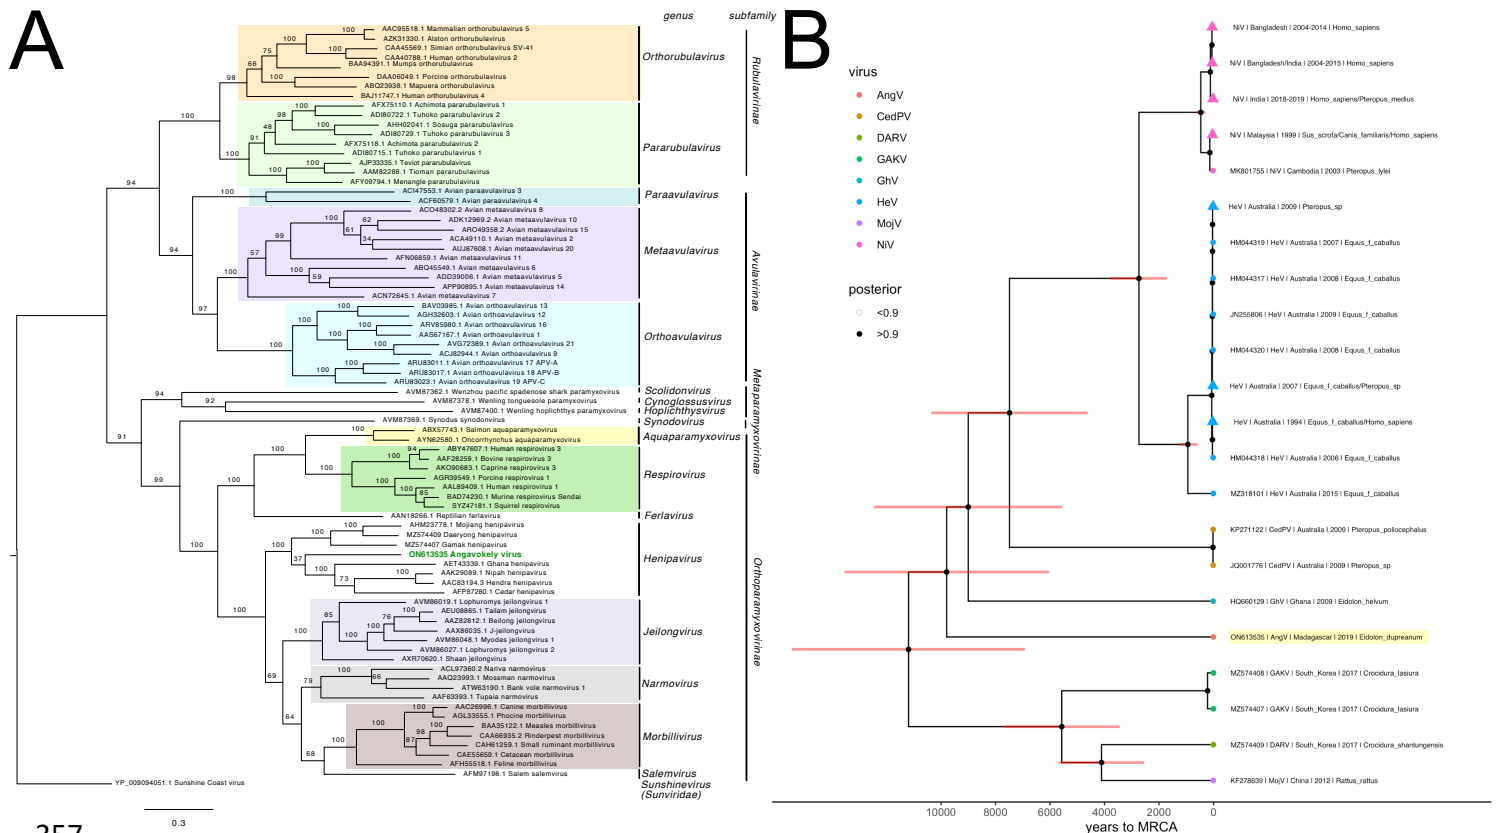

357

358 **Figure 4.** A. Phylogenetic analysis of the complete L protein sequences of members of the family *Paramyxoviridae*.

359 Tree is rooted with Sunshine Coast Virus (GenBank Accession #: YP\_009094051.1) as an outgroup, with outgroup

360 branch length shrunk for ease of viewing. Novel HNV, AngV, is depicted in green. Subfamilies and genera are

360

361 demarcated, excluding those unassigned to subfamily (genera *Scolidonvirus*, *Cynoglossusvirus*, *Hoplichthysvirus*).  
362 Bootstrap support is depicted and GenBank Accession numbers displayed next to virus names. Scale bar represents  
363 substitutions per site. B. Time-resolved Bayesian phylogeny computed in BEAST2 incorporating all available  
364 *Henipavirus* whole genome nucleotide sequences, with the addition of newly discovered GAKV, DARV, and AngV.  
365 Closely-related sequences are collapsed at triangle nodes for NiV and HeV (phylogeny with un-collapsed branches  
366 available in Supplemental Figure 2). 95% HPD intervals around the timing of each branching node are visualized as  
367 red horizontal bars. Posterior support >.9 is indicated by black coloring of the corresponding node, and distinct  
368 *Henipavirus* species are indicated by colored tip points, with AngV highlighted in yellow for further emphasis. The  
369 estimated time to MRCA for Angavokely virus and the previously-described bat-borne HNVs is 9,794 (95% HPD  
370 6,519 – 14,025) years ago.

371

372 In N, P, C, V, W, M and G amino acid phylogenies, the AngV proteins cluster closely with those  
373 of other HNVs (Supplemental Figure 3). Interestingly, in the amino acid phylogeny, the AngV F  
374 protein, like the F proteins of MojV, GAKV, and DARV, localizes ancestral to non-HNV  
375 paramyxoviruses and distinct from the bat-borne HNV clade (Supplemental Figure 3). The AngV  
376 L protein shows the highest amino acid identity to the L protein of rodent-borne Mount Mabu  
377 Lophuromys virus 2 (MMLV-2), a putative Jeilongvirus (46), but is nonetheless nested between  
378 the MojV/GAKV/DARV clade and the bat-borne HNV clade (Supplementary Figure 3).

379

### 380 *AngV glycoprotein*

381 We further examined the AngV G protein for conserved structural features and amino acid  
382 residues historically associated with HNV ephrin binding. AlphaFold analysis revealed a six-  
383 bladed  $\beta$ -propeller fold that is characteristic of *Paramyxoviridae* glycoproteins, with each blade  
384 largely composed of 4 antiparallel  $\beta$ -strands (Figure 5A). The  $\beta$ -propeller fold is stabilized by  
385 seven disulfide bonds that are conserved among HNVs (Supplemental Figure 4). This HNV  
386 protein G structure-based alignment reveals that the elongated AngV G protein primarily  
387 results from a lengthy C-terminal tail with an additional 67 aa beyond that of NiV G protein  
388 (Supplemental Figure 4). Similar to the MojV G protein, the AngV G protein lacks previously  
389 described ephrin binding residues (NiV W504, E505, T531, A532, E533, N557, and Y581) (Figure  
390 5B and Supplemental Figure 4) (16, 47, 48).

391

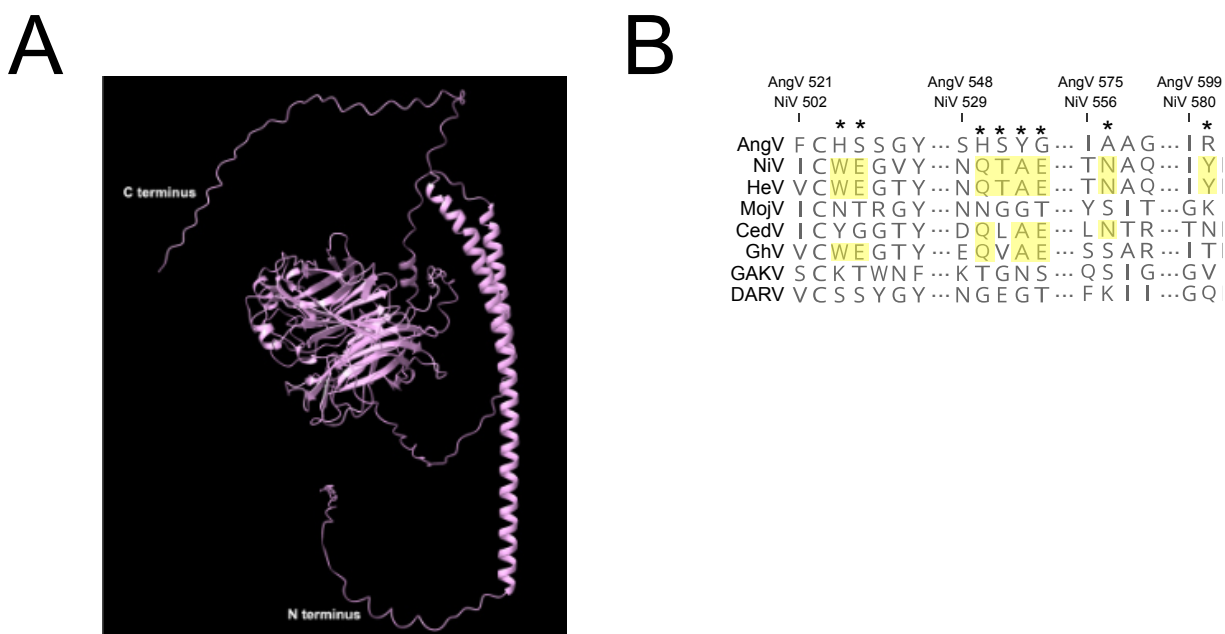

392  
 393 **Figure 5.** AlphaFold-predicted AngV glycoprotein 3D structure and ephrin binding residue sequence alignment. A.  
 394 AlphaFold-predicted 3D structure of AngV glycoprotein. N and C termini are indicated in white. B. Alignment of  
 395 HNV ephrin binding residues. The position of previously-described HNV ephrin binding residues are noted by a star,  
 396 and residues conserved across most HNVs are highlighted yellow. Amino acid position numbers displayed  
 397 represent the position within the AngV or NiV glycoproteins. Virus name (abbreviations) followed by GenBank  
 398 Accession #: Angavokely virus (AngV) ON613535; Nipah virus (NiV) AF212302; Hendra virus (HeV) AF017149;  
 399 Mojiang virus (MojV) KF278639; Cedar virus (CedV) JQ001776; Ghanaian bat Henipavirus (GhV) HQ660129; Gamak  
 400 virus (GAKV) MZ574407; Daeryong virus (DARV) MZ574409.

401

402

## 403 Discussion

404 We describe and characterize a novel HNV, AngV, from a urine sample collected from an *E.*  
 405 *dupreanum* Malagasy fruit bat. In this study, urine samples from 206 unique fruit bats were  
 406 assessed by metagenomic sequencing, yielding an overall positive HNV detection rate of 4.9%  
 407 (10/206) for all bats studied and a HNV prevalence of 9.4% (10/106) for the *E. dupreanum*  
 408 hosts. Of all the HNV positive samples, only one sample yielded sufficient reads for assembly of  
 409 a complete coding sequence and subsequent genomic analysis. In a 6-year collection period  
 410 spanning multiple wet/dry seasons, HNV positive samples were only recovered from *E.*  
 411 *dupreanum* bats in the Angavokely roosting site, despite prior serological evidence of HNV  
 412 infection in *P. rufus* and *R. madagascariensis* bats, as well (21). HNV RNA was recovered from *E.*

413 *dupreanum* in both wet and dry seasons, though higher sampling intensity throughout the wet  
414 season precludes any conclusions regarding underlying seasonal patterns in these data.  
415 Previous work in this system has suggested a seasonal increase in fruit bat seroprevalence  
416 across the winter low nutrient season, which also overlaps the gestation period for these  
417 synchronously breeding fruit bats (21). In fruit bat systems elsewhere, HNVs are also shed in  
418 urine at higher rates during the nutrient-poor dry seasons for the localities in question (49–51);  
419 in the case of NiV and HeV, these seasonal viral shedding pulses have been linked to zoonotic  
420 spillover.

421  
422 The recovered genome of AngV exhibits a structural organization characteristic of the  
423 *Henipavirus* genus and a nucleotide and amino acid identity to HeV and NiV that is comparable  
424 to those shared with the more distantly related HNVs, MojV, GhV and CedV. A limited quantity  
425 of available original sample precluded full genome recovery for AngV (as evidenced by the lack  
426 of the 5' UTR region of the N ORF), which prevented analysis of the extent to which the full  
427 AngV genome may abide by the 'Rule-of-Six', observed by all other members of the  
428 *Orthoparamyxovirinae* subfamily (52). Phylogenetic analyses of AngV support classification of  
429 this virus as a distinct novel bat-borne *Henipavirus* (L gene amino acid distance <0.82 distance  
430 for the subfamily *Orthoparamyxovirinae*), in accordance to the International Committee on  
431 Taxonomy of Viruses (ICTV) criteria (19). This novel HNV is estimated to have diverged  
432 approximately 9,800 years ago, prior to the currently known African and Asian bat-borne HNV  
433 lineages but considerably more recently than the estimated mid-to late-Miocene divergence of  
434 *E. dupreanum* from its sister species, *E. helvum*, on the African continent (53). Recent  
435 characterization of *Betacoronaviruses* in Madagascar fruit bats demonstrates surprising identity  
436 to lineages circulating in West Africa (22), suggesting that, despite their endemism, Malagasy  
437 fruit bats likely experience some form of contact with the African continent. Of the 49 bat  
438 species that inhabit the island nation of Madagascar, nine species are widely distributed across  
439 Africa, Asia, and/or Europe, presenting opportunities for inter-species viral transmission via  
440 island-hopping. Intensified viral sampling of Madagascar's insectivorous bat populations for  
441 HNVs thus represents an important future research priority.

442

443 As an ancestral bat-borne HNV, AngV may provide important insight into HNV evolution and  
444 pathogenesis. Similar to other paramyxoviruses, the encoded AngV P gene is able to produce  
445 multiple immunomodulatory protein products (54). One such protein product is the V protein,  
446 thought to be involved in immune evasion and considered a significant determinant of viral  
447 pathogenicity and lethality (55, 56). AngV harbors the highly conserved mRNA editing site and a  
448 predicted ORF that encodes a V protein with a conserved cysteine-rich C-terminus, suggesting  
449 that AngV has the capacity to produce a functional V protein. With the exception of the newly  
450 discovered HNVs in shrews, GAKV and DARV, all HNVs harboring a V protein have previously  
451 demonstrated evidence of human infection, highlighting the potential for AngV to cause  
452 productive infection in humans (1, 9, 12). Further studies are needed to ascertain the virulence  
453 potential and host breadth of this novel virus.

454

455 Characterization of the AngV glycoprotein (G) through AlphaFold modeling and structure-based  
456 alignments revealed a similar structural organization to other HNV glycoproteins. Notably, the  
457 AngV glycoprotein surpasses that of GhV as the longest glycoprotein of the *Henipavirus* genus.  
458 Like that of GhV, the AngV glycoprotein harbors a long C terminal extension (Supplemental  
459 Figure 4). It is unclear if the C terminal extension of the AngV glycoprotein has a functional role,  
460 though the C terminal extension of the glycoprotein in GhV is known to play a functional role in  
461 receptor-mediated fusion (15).

462

463 Henipavirus host tropism and virulence rely on a myriad of factors, one of which is the HNV  
464 glycoprotein. The previously characterized HNV glycoproteins of NiV, HeV, CedV, and GhV,  
465 utilize members of the ephrinA and ephrinB class family as host-cell receptors for viral entry  
466 into human cells (15–17, 47, 57). However, like MojV, the AngV glycoprotein lacks these well-  
467 conserved ephrin binding residues. Structure-based alignments can shed light on potential  
468 receptor binding residues when characterizing novel viruses. For instance, sequence-based  
469 comparisons of the GhV and NiV glycoproteins were used to predict GhV ephrin binding (12),  
470 which was later confirmed by crystallography (15). Structure-based alignment of the AngV



471 glycoprotein shows a lack of highly conserved ephrin binding residues, including NiV E533 – a  
472 seminal residue for ephrinB2 binding that is conserved across all ephrin binding HNVs. This  
473 suggests that, like MojV—and probably DARV and GAKV—the AngV glycoprotein may not bind  
474 ephrins, pointing to the possible use of an ancestral viral entry pathway. The growing number  
475 of novel HNVs that appear not to rely on ephrin binding for cellular entry could warrant re-  
476 evaluation of the existing HNV genus to better reflect conserved function and pathobiology.

477

478 This work presents a novel bat-HNV, AngV, identified from a Malagasy fruit bat. AngV joins a  
479 growing group of ancestral HNVs with unknown cell-entry receptors. Discovery of the cell  
480 surface receptor for AngV represents an important future research priority that will shed light  
481 on the breadth of host range for this virus, including its zoonotic potential.

482

483

484

485

486

487

488

489

490

491

492

493

494

495

496

497

498

499

## 500 Acknowledgements

501 The authors thank Anecia Gentles and Kimberly Rivera for help in the field and the lab and  
502 acknowledge the Virology Unit at the Institut Pasteur de Madagascar and Maira Phelps of the  
503 Chan Zuckerberg Biohub (CZB) for logistical support. They additionally thank Angela Detweiler,  
504 Michelle Tan, and Norma Neff of the CZB genomics platform for mNGS support. Molecular  
505 graphics and analyses were performed with UCSF ChimeraX, developed by the Resource for  
506 Biocomputing, Visualization, and Informatics at the University of California, San Francisco, with  
507 support from the National Institutes of Health R01-GM129325 and the Office of Cyber  
508 Infrastructure and Computational Biology, National Institute of Allergy and Infectious Diseases.

509

## 510 Funding

511 This work was supported by the National Institutes of Health (1R01AI129822-01 grant to JMH,  
512 PD, and CEB; 5T32AI007641-19 to SM; R01AI109022 to HAC), DARPA (PREEMPT Program  
513 Cooperative Agreement no. D18AC00031 to CEB), the Bill and Melinda Gates Foundation  
514 (GCE/ID OPP1211841 to CEB and JMH), the Adolph C. and Mary Sprague Miller Institute for  
515 Basic Research in Science (postdoctoral fellowship to CEB), the Branco Weiss Society in Science  
516 (fellowship to CEB), and the Chan Zuckerberg Biohub.

## 517 Conflict of Interests

518 The authors declare no competing interests.

519

## 520 Data Availability

521 Raw and assembled sequencing data are deposited in NCBI Bioproject PRJNA837298. The full  
522 genome of AngV is available in GenBank under Accession # ON613535. All raw data and code  
523 for figures can be obtained in our open-access GitHub repository:

524 <https://github.com/brooklabteam/angavokely-virus>

525

526

527

528

529   References

- 530           1.    Eaton BT, Broder CC, Middleton D, Wang L-F. 2006. Hendra and Nipah viruses:  
531           Different and dangerous. *Nat Rev Microbiol* 4:23–35.
- 532           2.    Sharma V, Kaushik S, Kumar R, Yadav JP, Kaushik S. 2019. Emerging trends of  
533           Nipah virus: A review. *Reviews in Medical Virology* 29.
- 534           3.    Arunkumar G, Chandni R, Mourya DT, Singh SK, Sadanandan R, Sudan P, Bhargava  
535           B. 2019. Outbreak investigation of Nipah Virus Disease in Kerala, India, 2018.  
536           *Journal of Infectious Diseases* 219:1867–1878.
- 537           4.    Murray K, Selleck P, Hooper P, Hyatt a, Gould a, Gleeson L, Westbury H, Hiley L,  
538           Selvey L, Rodwell B. 1995. A morbillivirus that caused fatal disease in horses and  
539           humans. *Science* 268:94–7.
- 540           5.    Hsu VP, Hossain MJ, Parashar UD, Ali MM, Ksiazek TG, Kuzmin I, Niezgod M,  
541           Rupprecht C, Bresee J, Breiman RF. 2004. Nipah virus encephalitis reemergence,  
542           Bangladesh. *Emerging Infectious Diseases* 10:2082–2087.
- 543           6.    Gurley ES, Montgomery JM, Hossain MJ, Bell M, Azad AK, Islam MR, Molla MAR,  
544           Carroll DS, Ksiazek TG, Rota PA, Lowe L, Comer JA, Rollin P, Czub M, Grolla A,  
545           Feldmann H, Woodward JL, Breiman RF. 2007. Person-to-Person transmission of  
546           Nipah virus in a Bangladeshi community. *Emerging Infectious Diseases* 13:1031–  
547           1037.
- 548           7.    Luby SP, Gurley ES. 2012. Epidemiology of Henipavirus Disease in Humans, p. 25–  
549           40. *In* Lee, B, Rota, PA (eds.), *Henipavirus*. Springer Berlin Heidelberg, Berlin,  
550           Heidelberg.
- 551           8.    Marsh GA, de Jong C, Barr JA, Tachedjian M, Smith C, Middleton D, Yu M, Todd S,  
552           Foord AJ, Haring V, Payne J, Robinson R, Broz I, Crameri G, Field HE, Wang L-F.  
553           2012. Cedar virus: a novel Henipavirus isolated from Australian bats. *PLoS*  
554           *Pathogens* 8:e1002836.
- 555           9.    Wu Z, Yang L, Yang F, Ren X, Jiang J, Dong J, Sun L, Zhu Y, Zhou H, Jin Q. 2014.  
556           Novel Henipa-like virus, Mojiang paramyxovirus, in rats, China, 2012. *Emerging*  
557           *Infectious Diseases* 20:1064–1066.

- 558 10. Lee SH, Kim K, Kim J, No JS, Park K, Budhathoki S, Lee SH, Lee J, Cho SH, Cho S, Lee  
559 GY, Hwang J, Kim HC, Klein TA, Uhm CS, Kim WK, Song JW. 2021. Discovery and  
560 genetic characterization of novel paramyxoviruses related to the genus  
561 henipavirus in crocidura species in the republic of Korea. *Viruses* 13.
- 562 11. Drexler JF, Corman VM, Müller MA, Maganga GD, Vallo P, Binger T, Gloza-Rausch  
563 F, Rasche A, Yordanov S, Seebens A, Oppong S, Adu Sarkodie Y, Pongombo C,  
564 Lukashev AN, Schmidt-Chanasit J, Stöcker A, Carneiro AJB, Erbar S, Maisner A,  
565 Fronhoffs F, Buettner R, Kalko EK v, Kruppa T, Franke CR, Kallies R, Yandoko ERN,  
566 Herrler G, Reusken C, Hassanin A, Krüger DH, Matthee S, Ulrich RG, Leroy EM,  
567 Drosten C. 2012. Bats host major mammalian paramyxoviruses. *Nat Commun*  
568 3:796.
- 569 12. Pernet O, Schneider BS, Beaty SM, LeBreton M, Yun TE, Park A, Zachariah TT,  
570 Bowden T a., Hitchens P, Ramirez CM, Daszak P, Mazet J, Freiberg AN, Wolfe ND,  
571 Lee B. 2014. Evidence for henipavirus spillover into human populations in Africa.  
572 *Nature Communications* 5:5342.
- 573 13. Amaya M, Broder CC. 2020. Vaccines to emerging viruses: Nipah and Hendra.  
574 *Annual Review of Virology* 7:447–473.
- 575 14. Cheliout Da Silva S, Yan L, Dang H v., Xu K, Epstein JH, Veessler D, Broder CC. 2021.  
576 Functional analysis of the fusion and attachment glycoproteins of mojiang  
577 henipavirus. *Viruses* 13.
- 578 15. Lee B, Pernet O, Ahmed A a., Zeltina A, Beaty SM, Bowden T a. 2015. Molecular  
579 recognition of human ephrinB2 cell surface receptor by an emergent African  
580 henipavirus. *Proceedings of the National Academy of Sciences* 201501690.
- 581 16. Laing ED, Navaratnarajah CK, Cheliout S, Silva D, Petzing SR, Xu Y, Broder CC, Xu K.  
582 2019. Structural and functional analyses reveal promiscuous and species specific  
583 use of ephrin receptors by Cedar virus. *Proceedings of the National Academy of*  
584 *Sciences* 116:20707–20715.
- 585 17. Rissanen I, Ahmed AA, Azarm K, Beaty S, Hong P, Nambulli S, Duprex WP, Lee B,  
586 Bowden TA. 2017. Idiosyncratic Mòjiang virus attachment glycoprotein directs a

- 587 host-cell entry pathway distinct from genetically related henipaviruses. *Nature*  
588 *Communications* 8.
- 589 18. Flick R, Walpita P, Czub M. 2006. Nipah and Hendra viral infections, p. 586–589. *In*  
590 *Tropical Infectious Diseases*. Churchill Livingstone.
- 591 19. Rima B, Buschmann AB-, Dundon WG, Duprex P, Easton A, Fouchier R, Kurath G,  
592 Lamb R, Lee B, Rota P, Wang L, Consortium IR. 2019. ICTV Virus Taxonomy Profile:  
593 *Paramyxoviridae*. *Journal of General Virology* 100:1593–1594.
- 594 20. Calain P, Roux L. 1993. The rule of six, a basic feature for efficient replication of  
595 Sendai virus defective interfering RNA. *Journal of Virology* 67:4822–4830.
- 596 21. Brook CE, Ranaivoson HC, Broder CC, Cunningham AA, Héraud J-M, Peel AJ, Gibson  
597 L, Wood JLN, Metcalf CJ, Dobson AP. 2019. Disentangling serology to elucidate  
598 henipa- and filovirus transmission in Madagascar fruit bats. *Journal of Animal*  
599 *Ecology* 88:1001–1016.
- 600 22. Kettenburg G, Kistler A, Ranaivoson HC, Ahyong V, Andrianiana A, Andry S, DeRisi  
601 JL, Gentles A, Raharinosy V, Randriambolamanantsoa TH, Ravelomanantsoa NAF,  
602 Tato CM, Dussart P, Heraud J-M, Brook CE. 2022. Full genome Nobecovirus  
603 sequences from Malagasy fruit bats define a unique evolutionary history for this  
604 coronavirus clade. *Frontiers in Public Health* 10.
- 605 23. Brook CE, Ranaivoson HC, Andriafidison D, Ralisata M, Razafimanahaka J, Héraud J,  
606 Dobson AP, Metcalf CJ. 2019. Population trends for two Malagasy fruit bats.  
607 *Biological Conservation* 234:165–171.
- 608 24. Ranaivoson HC, Héraud J-M, Goethert HK, Telford III SR, Rabetafika L, Brook CE.  
609 2019. Babesial infection in the Madagascar flying fox, *Pteropus rufus* É. Geoffroy,  
610 1803. *Parasites & Vectors* 1–13.
- 611 25. Brook CE, Bai Y, Dobson AP, Osikowicz LM, Ranaivoson HC, Zhu Q, Kosoy MY,  
612 Dittmar K. 2015. Bartonella spp. in Fruit Bats and Blood-Feeding Ectoparasites in  
613 Madagascar. *PLoS Neglected Tropical Diseases* 9.
- 614 26. Kalantar KL, Carvalho T, de Bourcy CFA, Dimitrov B, Dingle G, Egger R, Han J,  
615 Holmes OB, Juan YF, King R, Kislyuk A, Lin MF, Mariano M, Morse T, Reynoso L v.,

- 616 Cruz DR, Sheu J, Tang J, Wang J, Zhang MA, Zhong E, Ah Yong V, Lay S, Chea S, Bohl  
617 JA, Manning JE, Tato CM, DeRisi JL. 2021. IDseq-An open source cloud-based  
618 pipeline and analysis service for metagenomic pathogen detection and  
619 monitoring. *Gigascience* 9:1–14.
- 620 27. Bolger AM, Lohse M, Usadel B. 2014. Trimmomatic: A flexible trimmer for Illumina  
621 sequence data. *Bioinformatics* 30:2114–2120.
- 622 28. Dobin A, Davis CA, Schlesinger F, Drenkow J, Zaleski C, Jha S, Batut P, Chaisson M,  
623 Gingeras TR. 2013. STAR: Ultrafast universal RNA-seq aligner. *Bioinformatics*  
624 29:15–21.
- 625 29. Langmead B, Salzberg SL. 2012. Fast gapped-read alignment with Bowtie 2. *Nature*  
626 9:357–360.
- 627 30. Zhao Y, Tang H, Ye Y. 2012. RAPSearch2: A fast and memory-efficient protein  
628 similarity search tool for next-generation sequencing data. *Bioinformatics* 28:125–  
629 126.
- 630 31. Wu TD, Nacu S. 2010. Fast and SNP-tolerant detection of complex variants and  
631 splicing in short reads. *Bioinformatics* 26:873–881.
- 632 32. Bankevich A, Nurk S, Antipov D, Gurevich AA, Dvorkin M, Kulikov AS, Lesin VM,  
633 Nikolenko SI, Pham S, Prjibelski AD, Pyshkin A v., Sirotkin A v., Vyahhi N, Tesler G,  
634 Alekseyev MA, Pevzner PA. 2012. SPAdes: A new genome assembly algorithm and  
635 its applications to single-cell sequencing. *Journal of Computational Biology*  
636 19:455–477.
- 637 33. Altschul SF, Gish W, Miller W, Myers EW, Lipman DJ. 1990. Basic local alignment  
638 search tool. *Journal of Molecular Biology* 215:403–410.
- 639 34. Edgar RC. 2004. MUSCLE: Multiple sequence alignment with high accuracy and  
640 high throughput. *Nucleic Acids Research* 32:1792–1797.
- 641 35. Darriba Di, Posada D, Kozlov AM, Stamatakis A, Morel B, Flouri T. 2020.  
642 ModelTest-NG: A new and scalable tool for the selection of DNA and protein  
643 evolutionary models. *Molecular Biology and Evolution* 37:291–294.

- 644 36. Kozlov AM, Darriba D, Flouri T, Morel B, Stamatakis A. 2019. RAxML-NG: A fast,  
645 scalable and user-friendly tool for maximum likelihood phylogenetic inference.  
646 *Bioinformatics* 35:4453–4455.
- 647 37. Felsenstein J. 1985. Confidence limits on phylogenies: An approach using the  
648 bootstrap. *Evolution (N Y)* 39:783–791.
- 649 38. Pattengale ND, Alipour M, Bininda-Emonds ORP, Moret BME, Stamatakis A. 2010.  
650 How many bootstrap replicates are necessary? *Journal of Computational Biology*  
651 17:337–354.
- 652 39. Bouckaert R, Heled J, Kühnert D, Vaughan T, Wu CH, Xie D, Suchard MA, Rambaut  
653 A, Drummond AJ. 2014. BEAST 2: A software platform for Bayesian evolutionary  
654 analysis. *PLoS Computational Biology* 10.
- 655 40. Drummond AJ, Suchard MA, Xie D, Rambaut A. 2012. Bayesian phylogenetics with  
656 BEAUti and the BEAST 1.7. *Molecular Biology and Evolution* 29:1969–1973.
- 657 41. Rambaut A, Drummond AJ, Xie D, Baele G, Suchard MA. 2018. Posterior  
658 summarization in Bayesian phylogenetics using Tracer 1.7. *Systematic Biology*  
659 67:901–904.
- 660 42. Drummond AJ, Rambaut A. 2007. BEAST: Bayesian evolutionary analysis by  
661 sampling trees. *BMC Evolutionary Biology* 7.
- 662 43. Yu G, Smith DK, Zhu H, Guan Y, Lam TTY. 2017. Ggtree: an R Package for  
663 visualization and annotation of phylogenetic trees with their covariates and other  
664 associated data. *Methods in Ecology and Evolution* 8:28–36.
- 665 44. Jumper J, Evans R, Pritzel A, Green T, Figurnov M, Ronneberger O,  
666 Tunyasuvunakool K, Bates R, Žídek A, Potapenko A, Bridgland A, Meyer C, Kohl  
667 SAA, Ballard AJ, Cowie A, Romera-Paredes B, Nikolov S, Jain R, Adler J, Back T,  
668 Petersen S, Reiman D, Clancy E, Zielinski M, Steinegger M, Pacholska M,  
669 Berghammer T, Bodenstein S, Silver D, Vinyals O, Senior AW, Kavukcuoglu K, Kohli  
670 P, Hassabis D. 2021. Highly accurate protein structure prediction with AlphaFold.  
671 *Nature* 596:583–589.

- 672 45. Pettersen EF, Goddard TD, Huang CC, Meng EC, Couch GS, Croll TI, Morris JH,  
673 Ferrin TE. 2021. UCSF ChimeraX: Structure visualization for researchers, educators,  
674 and developers. *Protein Science* 30:70–82.
- 675 46. Vanmechelen B, Bletsa M, Laenen L, Lopes AR, Vergote V, Beller L, Deboutte W,  
676 Korva M, Avšič Županc T, Goüy de Bellocq J, Gryseels S, Leirs H, Lemey P, Vrancken  
677 B, Maes P. 2018. Discovery and genome characterization of three new  
678 Jeilongviruses, a lineage of paramyxoviruses characterized by their unique  
679 membrane proteins. *BMC Genomics* 19.
- 680 47. Guillaume V, Aslan H, Ainouze M, Guerbois M, Fabian Wild T, Buckland R,  
681 Langedijk JPM. 2006. Evidence of a potential receptor-binding site on the Nipah  
682 virus G protein (NiV-G): Identification of globular head residues with a role in  
683 fusion promotion and their localization on an NiV-G structural model. *Journal of*  
684 *Virology* 80:7546–7554.
- 685 48. Negrete OA, Wolf MC, Aguilar HC, Enterlein S, Wang W, Mühlberger E, Su S v.,  
686 Bertolotti-Ciarlet A, Flick R, Lee B. 2006. Two key residues in EphrinB3 are critical  
687 for its use as an alternative receptor for Nipah virus. *PLoS Pathogens* 2:0078–0086.
- 688 49. Field H, Jordan D, Edson D, Morris S, Melville D, Parry-Jones K, Broos A, Divljan A,  
689 McMichael L, Davis R, Kung N, Kirkland P, Smith C. 2015. Spatiotemporal Aspects  
690 of Hendra Virus Infection in Pteropid Bats (Flying-Foxes) in Eastern Australia. *Plos*  
691 *One* 10:e0144055.
- 692 50. Páez DJ, Giles J, Mccallum H, Field H, Jordan D, Peel AJ, Plowright RK. 2017.  
693 Conditions affecting the timing and magnitude of Hendra virus shedding across  
694 pteropodid bat populations in Australia. *Epidemiology and Infection* 145:3143–  
695 3153.
- 696 51. Cappelle J, Furey N, Hoem T, Ou TP, Lim T, Hul V, Heng O, Chevalier V, Dussart P,  
697 Duong V. 2021. Longitudinal monitoring in Cambodia suggests higher circulation of  
698 alpha and betacoronaviruses in juvenile and immature bats of three species.  
699 *Scientific Reports* 11:24145.



- 700           52.   Hausmann S, Jacques J-P, Kolakofsky D. 1996. Paramyxovirus RNA editing and the  
701           requirement for hexamer genome length. *RNA* 2:1033–1045.
- 702           53.   Shi JJ, Chan LM, Peel AJ, Lai R, Yoder AD, Goodman SM. 2014. A deep divergence  
703           time between sister species of eidolon (*Pteropodidae*) with evidence for  
704           widespread panmixia. *Acta Chiropterologica* 16:279–292.
- 705           54.   Douglas J, Drummond AJ, Kingston RL. 2021. Evolutionary history of  
706           cotranscriptional editing in the paramyxoviral phosphoprotein gene. *Virus*  
707           Evolution 7.
- 708           55.   Satterfield BA, Cross RW, Fenton KA, Agans KN, Basler CF, Geisbert TW, Mire CE.  
709           2015. The immunomodulating v and W proteins of Nipah virus determine disease  
710           course. *Nature Communications* 6.
- 711           56.   Patterson JB, Thomas D, Lewicki H, Billeter MA, Oldstone MBA. 2000. V and C  
712           proteins of measles virus function as virulence factors in vivo. *Virology* 267:80–89.
- 713           57.   Negrete OA, Chu D, Aguilar HC, Lee B. 2007. Single amino acid changes in the  
714           Nipah and Hendra virus attachment glycoproteins distinguish ephrinB2 from  
715           ephrinB3 usage. *Journal of Virology* 81:10804–10814.

716

717

718

719

720

721

722

723

724

725

726

727

728

729 **Table 1.** Prevalence of HNV infections in the urine of Malagasy bats captured during 2013-2019  
 730 collection period.

| Roost site  | Species                    | By Site       |                            | Season      | By Season/Sex         |                                    |
|-------------|----------------------------|---------------|----------------------------|-------------|-----------------------|------------------------------------|
|             |                            | Total sampled | Total henipavirus positive |             | Total sampled # (M,F) | Total henipavirus positive # (M,F) |
| Ambakoana   | <i>P. rufus</i>            | 18            | 0                          | wet '13     | 2 (1,1)               | 0 (0,0)                            |
|             |                            |               |                            | wet '14/'15 | 3 (3,0)               |                                    |
|             |                            |               |                            | wet '15/'16 | 2 (2,0)               |                                    |
|             |                            |               |                            | wet '17/'18 | 2 (2,0)               |                                    |
|             |                            |               |                            | wet '18/'19 | 9 (6,3)               |                                    |
| Angavobe    | <i>E. dupreanum</i>        | 8             | 0                          | wet '17/'18 | 5 (1,4)               | 0 (0,0)                            |
|             |                            |               |                            | dry '18     | 3 (1,2)               | 0 (0,0)                            |
| Angavokely  | <i>E. dupreanum</i>        | 98            | 10                         | wet '15/'16 | 2 (1,1)               | 0 (0,0)                            |
|             |                            |               |                            | wet '17/'18 | 38 (5,33)             | 4 (0,4)                            |
|             |                            |               |                            | dry '18     | 11 (8,3)              | 2 (1,1)                            |
|             |                            |               |                            | wet '18/'19 | 47 (20,27)            | 4 (2,2)                            |
| Mahabo      | <i>P. rufus</i>            | 8             | 0                          | dry '14     | 8 (4,4)               | 0 (0,0)                            |
| Mahialambo  | <i>P. rufus</i>            | 5             | 0                          | wet '18/'19 | 5 (2,3)               | 0 (0,0)                            |
| Makira      | <i>P. rufus</i>            | 2             | 0                          | dry '15     | 2 (2,0)               | 0 (0,0)                            |
| Marovitsika | <i>P. rufus</i>            | 62            | 0                          | wet '17/'18 | 9 (3,6)               | 0 (0,0)                            |
|             |                            |               |                            | dry '18     | 7 (3,4)               |                                    |
|             |                            |               |                            | wet '18/'19 | 46 (20,26)            |                                    |
| Maromizaha  | <i>R. madagascariensis</i> | 5             | 0                          | wet '13     | 2 (1,1)               | 0 (0,0)                            |
|             |                            |               |                            | dry '14     | 1 (0,1)               |                                    |
|             |                            |               |                            | wet '14/'15 | 2 (2,0)               |                                    |

731

732

733

734

735

736

737 **Table 2.** Length and pairwise sequence identity of predicted open reading frames of AngV and  
 738 other HNv.  
 739

| Gene     | AngV<br>length aa | NiV                     |                       |                       |                       |                       |                       |                       |
|----------|-------------------|-------------------------|-----------------------|-----------------------|-----------------------|-----------------------|-----------------------|-----------------------|
|          |                   | length aa<br>(%nt, %aa) | HeV                   | MojV                  | CedV                  | GAKV                  | DARV                  | GhV                   |
| <b>N</b> | 514               | 532<br>(56.4, 48.0)     | 532<br>(55.4, 46.7)   | 539<br>(55.8, 45.3)   | 510<br>(57.5, 48.3)   | 533<br>(58.0, 47.5)   | 574<br>(55.3, 24.0)   | 514<br>(56.2, 48.9)   |
| <b>P</b> | 693               | 709<br>(47.8, 25.1)     | 707<br>(48.1, 24.1)   | 694<br>(47.6, 23.6)   | 737<br>(42.3, 21.6)   | 586<br>(43.8, 22.5)   | 698<br>(47.3, 23.2)   | 870<br>(42.2, 23.1)   |
| <b>C</b> | 173               | 166<br>(51.3, 25.7)     | 166<br>(51.5, 25.1)   | 177<br>(47.6, 22.5)   | 177<br>(54.5, 29.8)   | 184<br>(47.4, 27.5)   | 175<br>(48.1, 24.0)   | 163<br>(46.1, 23.1)   |
| <b>V</b> | 461               | 456<br>(46.9, 22.8)     | 457<br>(48.5, 23.6)   | 464<br>(47.2, 24.5)   |                       | 370<br>(43.0, 22.3)   | 468<br>(47.2, 22.2)   | 621<br>(24.7, 19.8)   |
| <b>W</b> | 412               | 450<br>(47.0, 21.3)     | 448<br>(45.0, 20.0)   | 435<br>(46.5, 22.5)   |                       | 331<br>(43.9, 22.7)   | 437<br>(45.5, 21.1)   | 572<br>(39.3, 16.8)   |
| <b>M</b> | 354               | 352<br>(60.0, 54.6)     | 352<br>(59.5, 54.0)   | 340<br>(57.1, 53.4)   | 360<br>(56.9, 53.1)   | 340<br>(56.1, 50.8)   | 345<br>(56.5, 52.3)   | 343<br>(56.9, 51.4)   |
| <b>F</b> | 539               | 546<br>(53.7, 39.4)     | 546<br>(51.7, 39.4)   | 545<br>(52.2, 40.6)   | 557<br>(51.8, 36.3)   | 565<br>(53.3, 39.4)   | 545<br>(58.8, 40.1)   | 662<br>(45.5, 35.4)   |
| <b>G</b> | 688               | 602<br>(43.5, 21.4)     | 604<br>(43.8, 20.4)   | 625<br>(43.0, 21.2)   | 622<br>(43.3, 19.8)   | 635<br>(44.9, 17.8)   | 628<br>(44.3, 18.7)   | 632<br>(42.5, 19.8)   |
| <b>L</b> | 2,259             | 2,244<br>(74.7, 52.2)   | 2,244<br>(57.6, 51.9) | 2,277<br>(57.5, 51.8) | 2,501<br>(52.4, 44.8) | 2,291<br>(57.7, 51.0) | 2,271<br>(58.8, 51.3) | 2,250<br>(57.0, 49.1) |

740  
 741  
 742  
 743  
 744  
 745  
 746  
 747  
 748  
 749

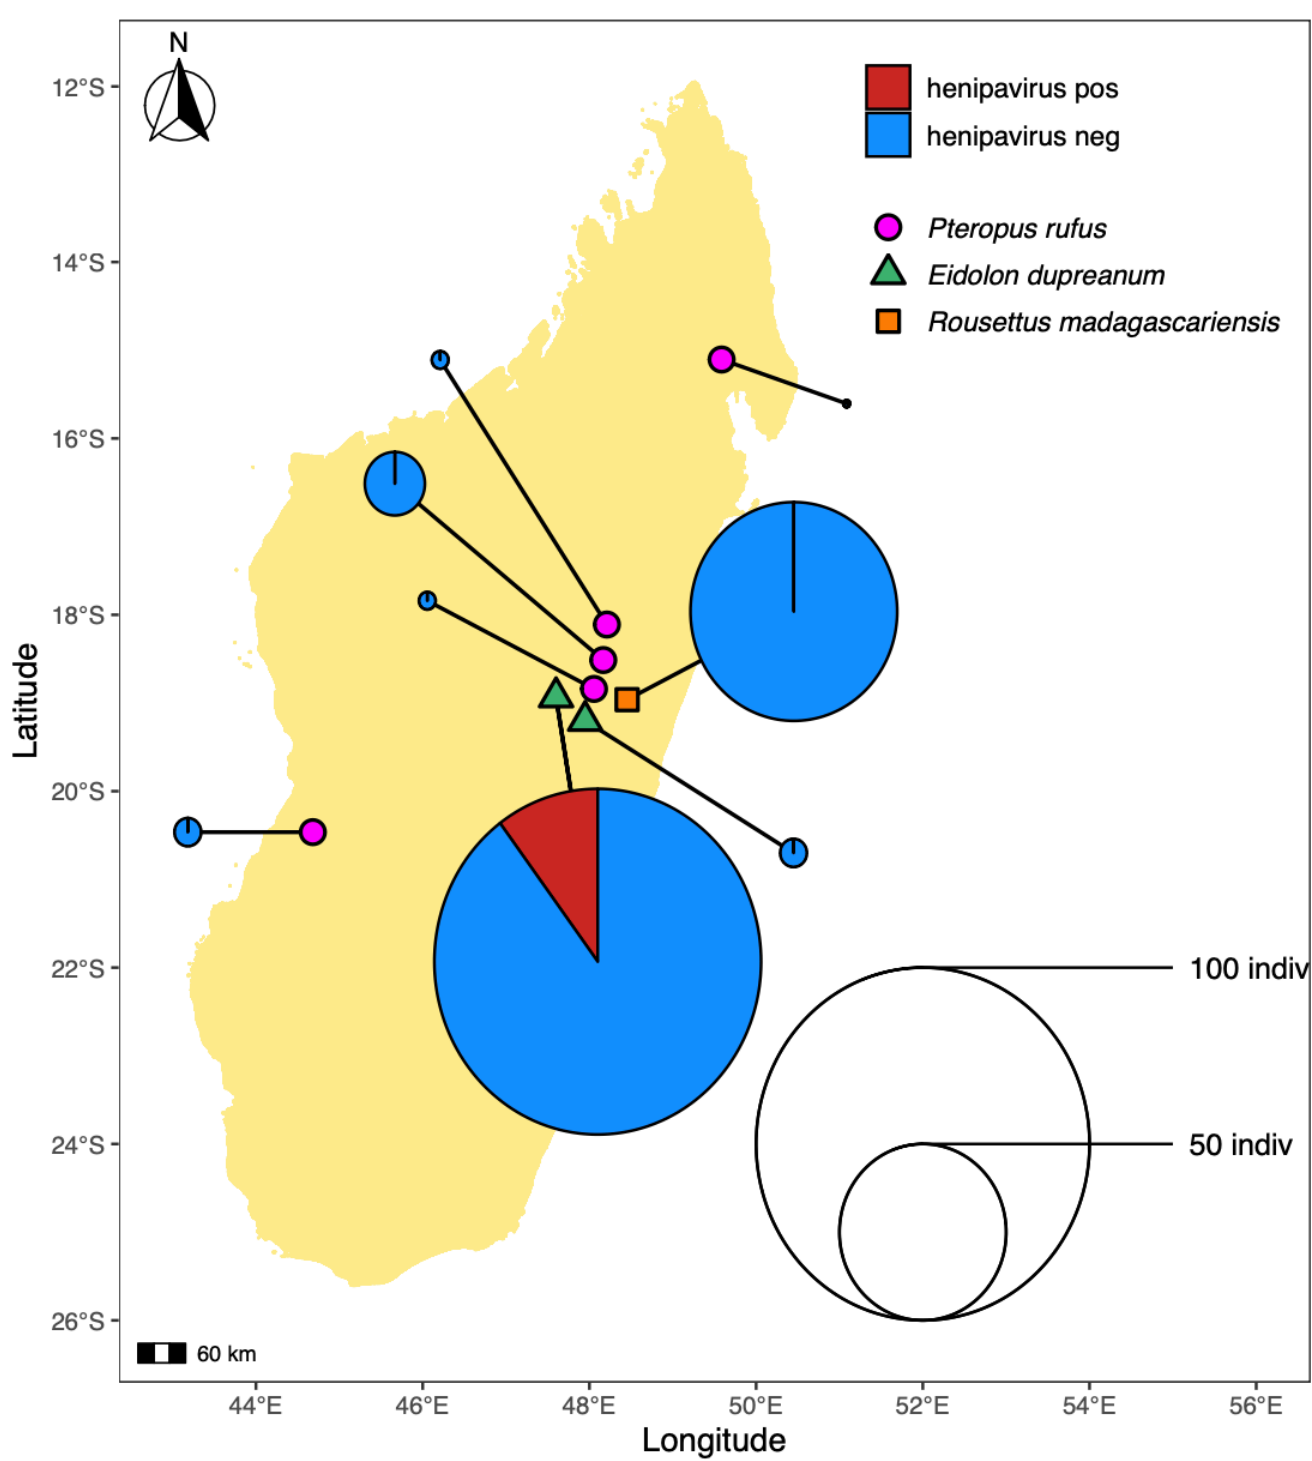

**A**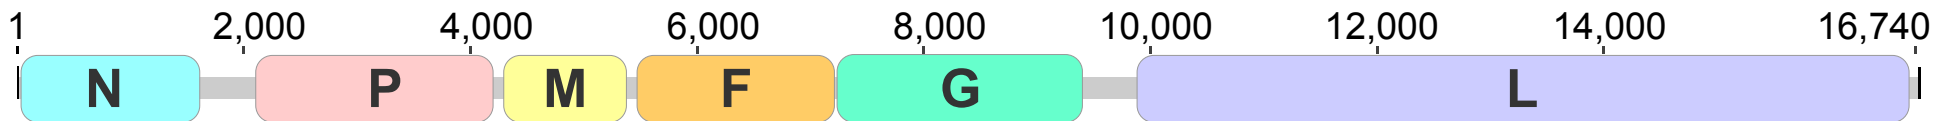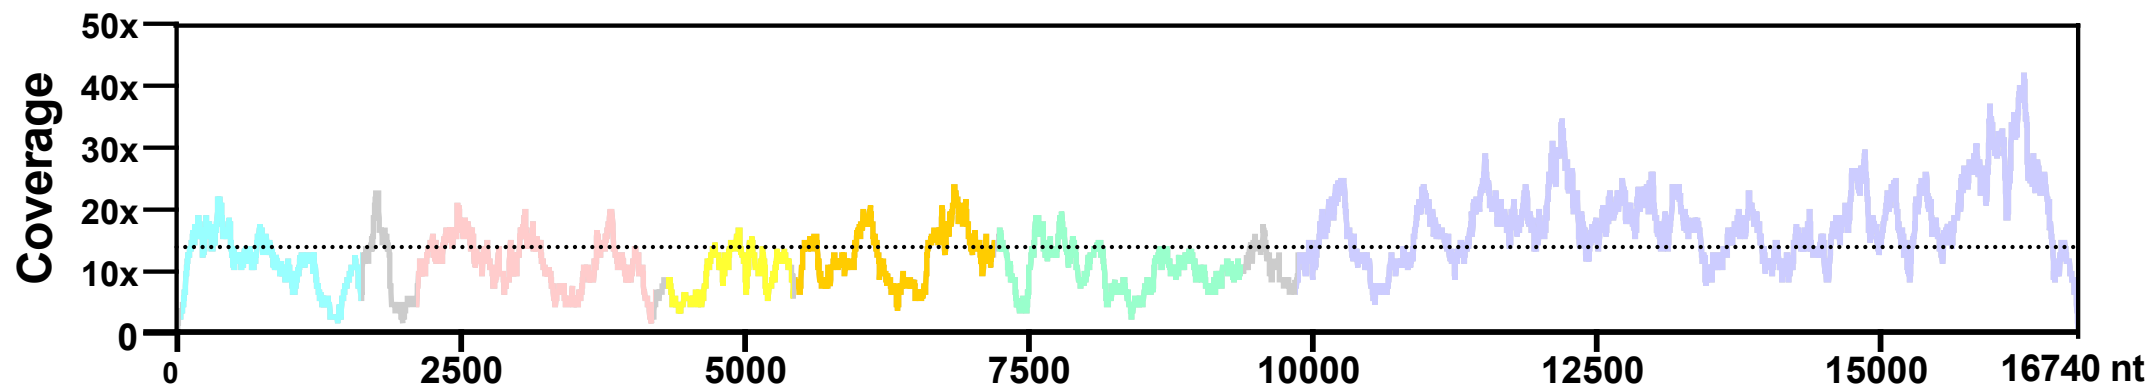**B**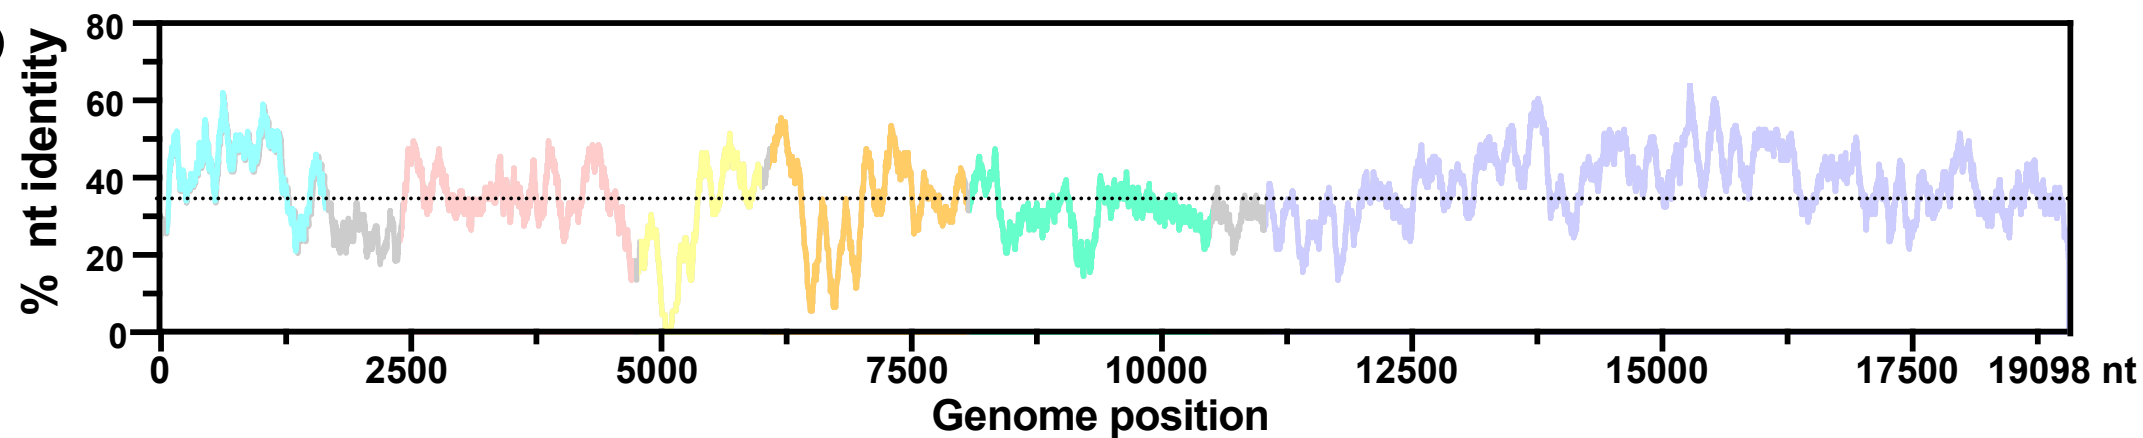**C**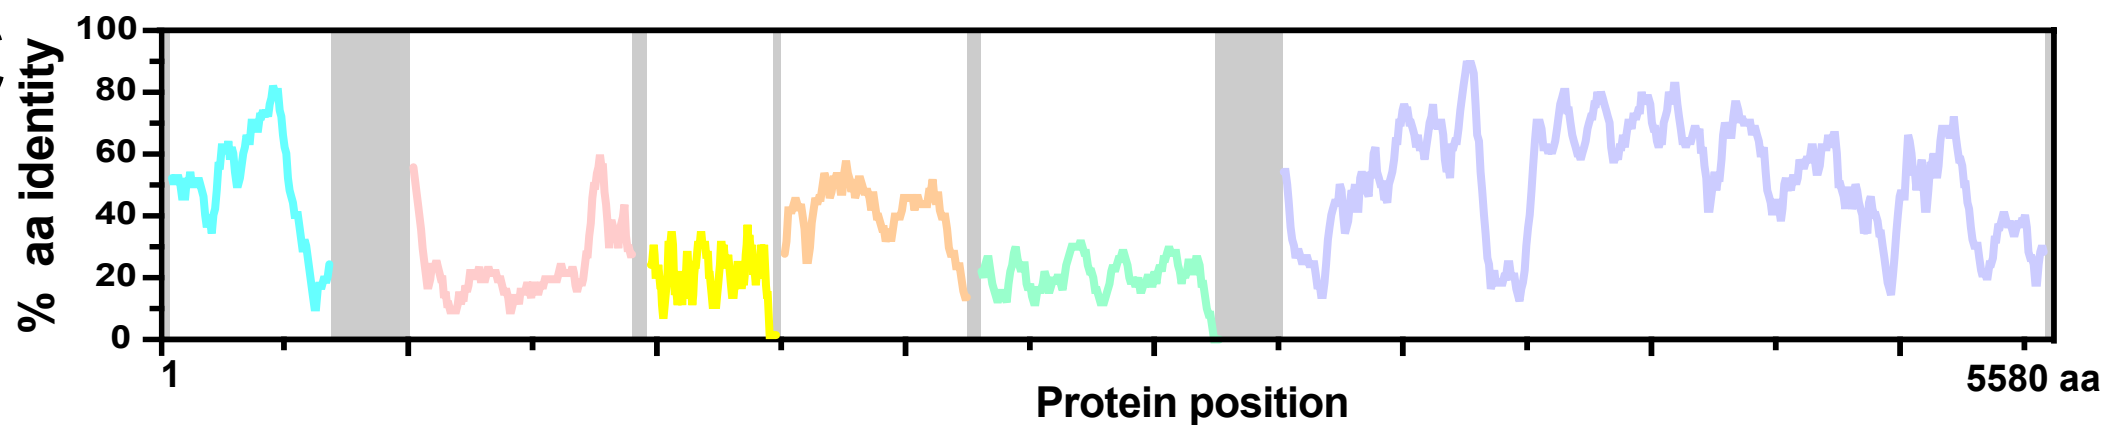

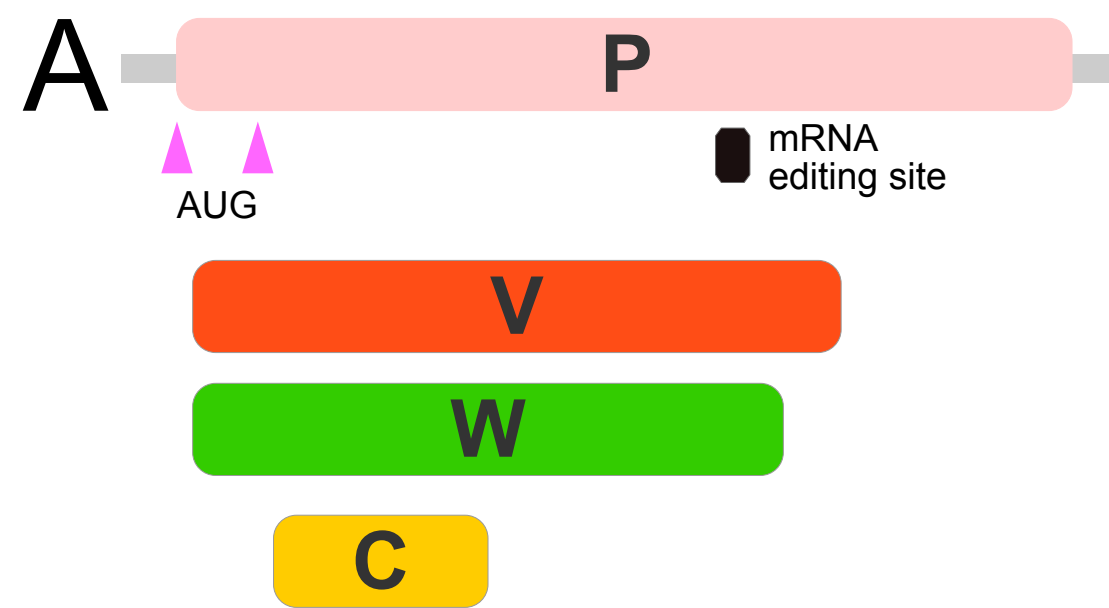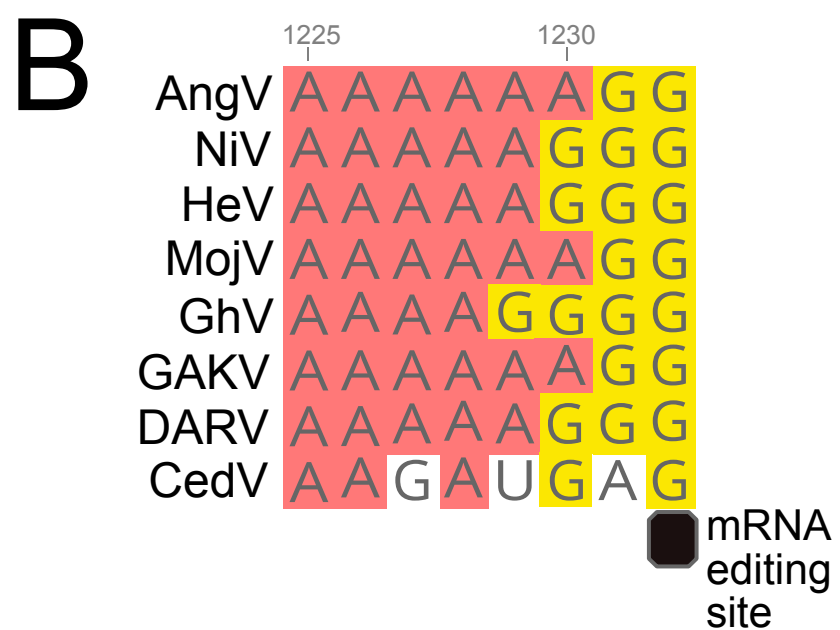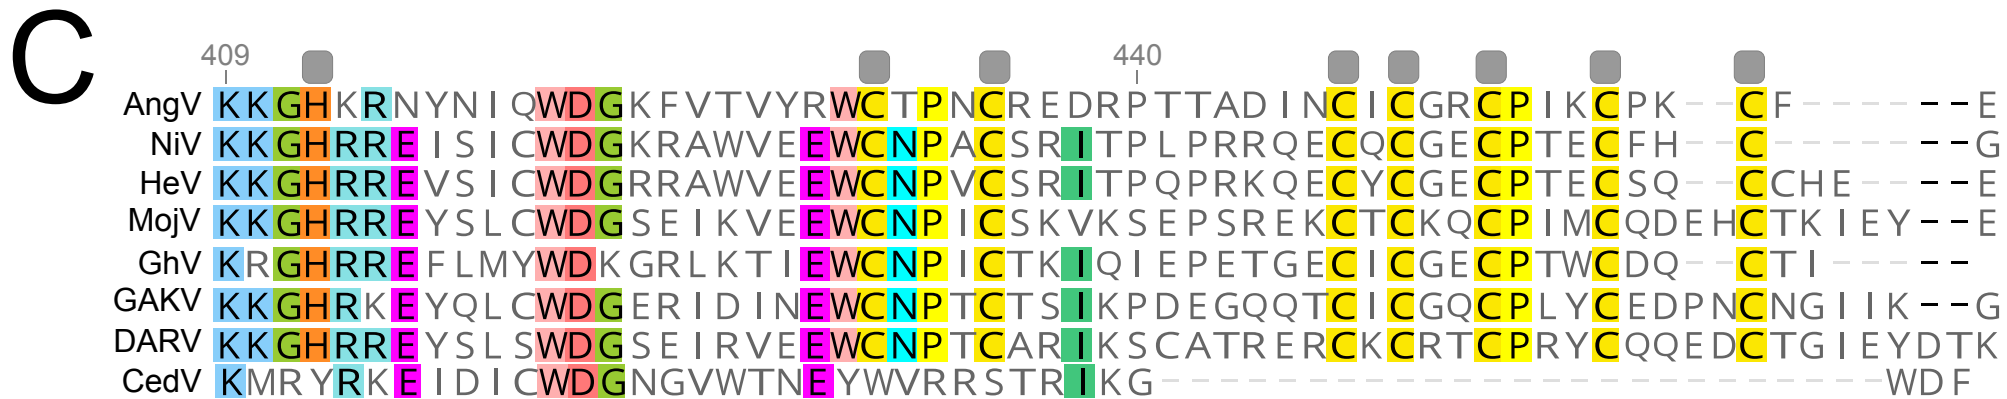

# A

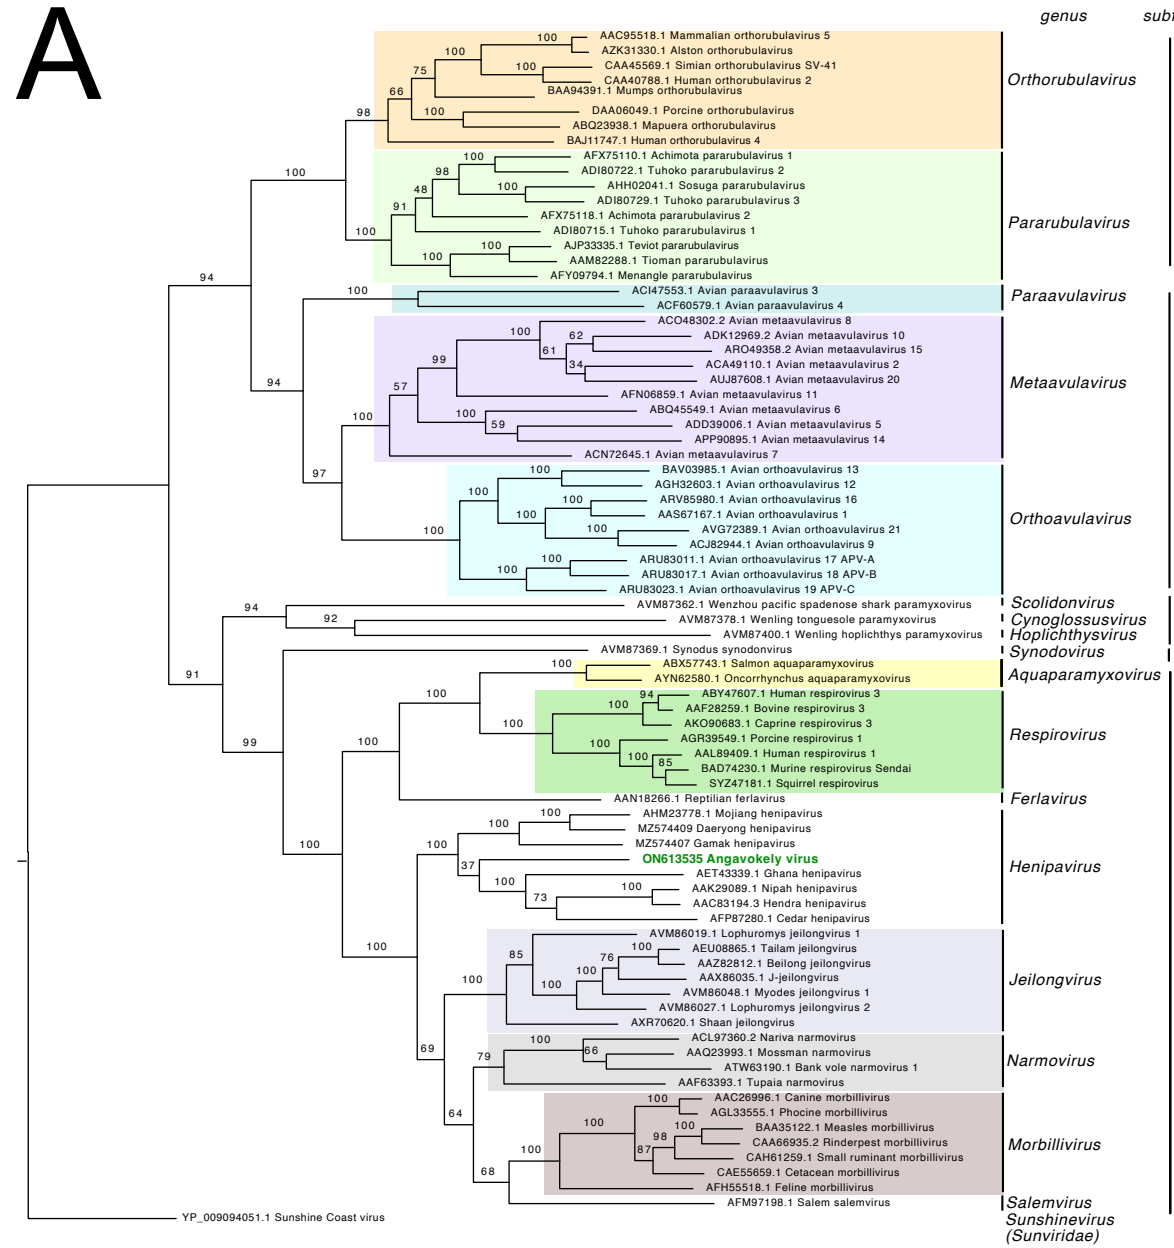

# B

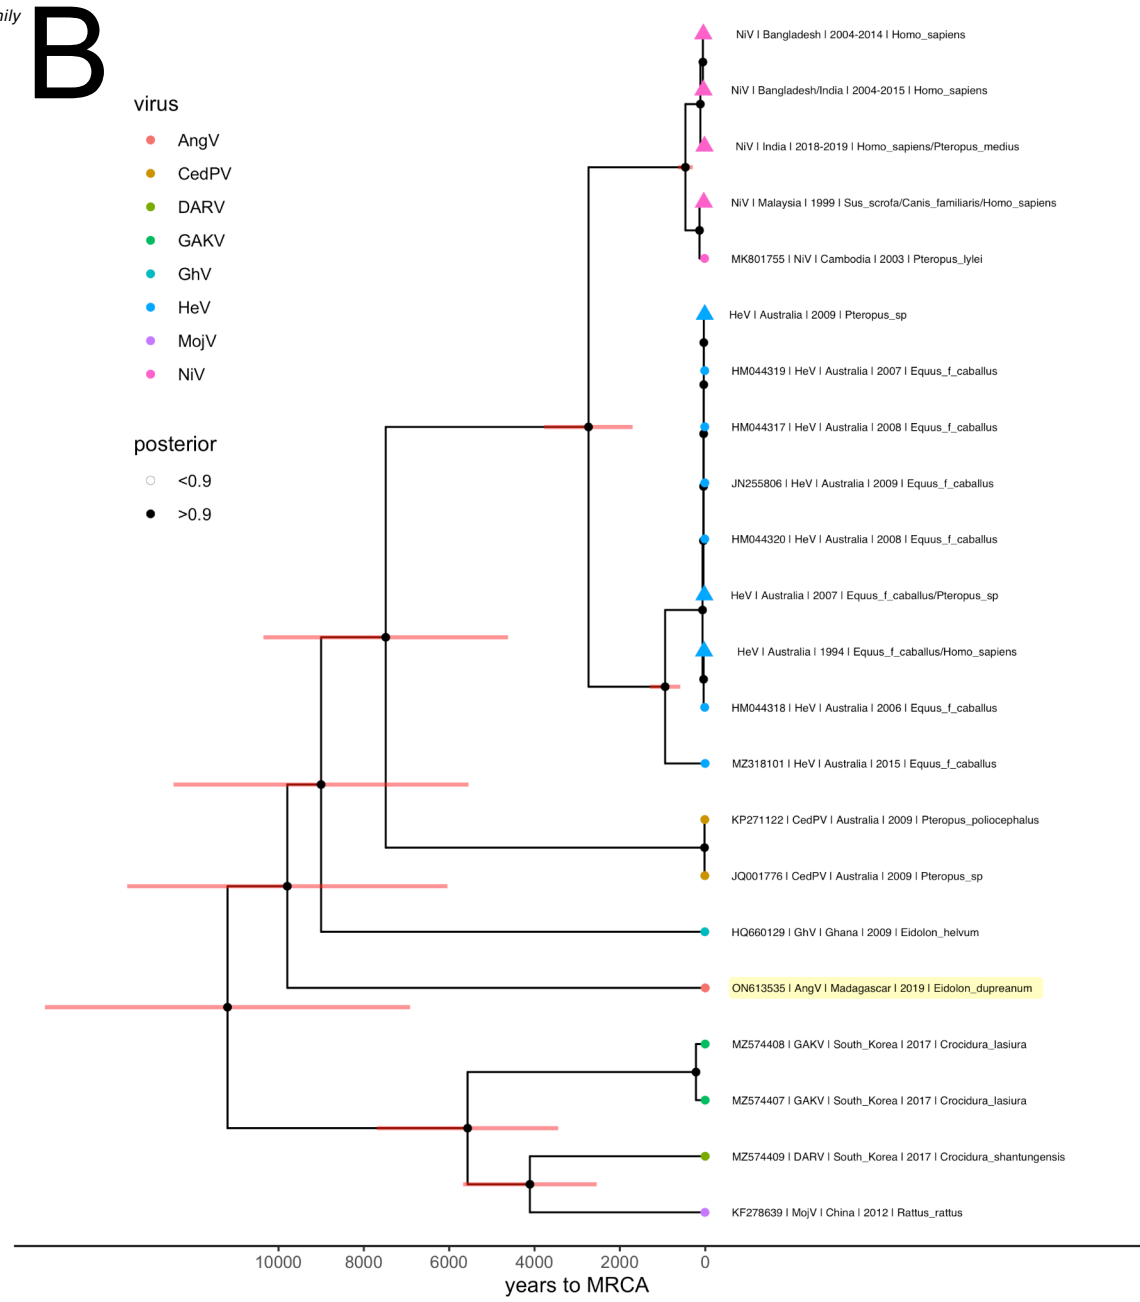

A

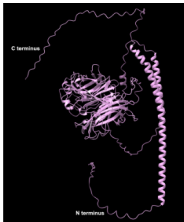

B

|      | AngV 521 |     | AngV 545 |     | AngV 573 |     | AngV 599 |
|------|----------|-----|----------|-----|----------|-----|----------|
|      | NIV 502  |     | NIV 529  |     | NIV 556  |     | NIV 580  |
| AngV | FCHSSGY  | ... | SHSYG    | ... | IAAG     | ... | IR       |
| NIV  | ICWEGVY  | ... | NQTAE    | ... | TNAQ     | ... | IY       |
| HeV  | VCWEGTY  | ... | NQTAE    | ... | TNAQ     | ... | IY       |
| MojV | ICNTRGY  | ... | NNGGT    | ... | YSIT     | ... | GK       |
| CedV | ICYGGTY  | ... | DQLAE    | ... | LNTR     | ... | TN       |
| GhV  | VCWEGTY  | ... | EQVAE    | ... | SSAR     | ... | IT       |
| GAKV | SCKTWNF  | ... | KTGNS    | ... | QSIG     | ... | GV       |
| DARV | VCSSYGY  | ... | NGEGT    | ... | FKII     | ... | GQ       |
